# Supplementary material for: Revealing the Anti-Tumor Effect of Artificial miRNA p-27-5p on Human Breast Carcinoma Cell Line T-47D
Source: Int J Mol Sci. 2012 May 23;13(5):6352–69. doi: 10.3390/ijms13056352 (PMC3382822; doi:10.3390/ijms13056352)
Supplement: Supplementary file 1 [file ijms-13-06352-s001.xls]

## Sheet: down-regulated gene list
Revealing the Anti-tumor Effect of Artificial miRNA p-27-5p on Human Breast Carcinoma Cell Line T-47D
Supplementary Information
Table S.1. The down-regulated gene expression in miR p-27-5p-treated T-47D breast cancer cells.
Gene Symbol	GB_Accession	GeneName	Fold (mimic/CTL)	p-Value
TTLL12	BF965437	tubulin tyrosine ligase-like family, member 12	0.893817	2.31e-05
MOBKL1B	D80006	MOB1, Mps One Binder kinase activator-like 1B (yeast), mRNA (cDNA clone MGC:4929 IMAGE:3448503)	0.887719	0.000105927
SPDEF	NM_012391	SAM pointed domain containing ets transcription factor	0.880236	0.000109787
PDHA1	NM_000284	pyruvate dehydrogenase (lipoamide) alpha 1	0.940821	0.000111115
BTBD6	AW149498	BTB (POZ) domain containing 6	0.798677	0.000119451
TBXA2R	D38081	thromboxane A2 receptor	0.957831	0.000138275
PADI3	NM_016233	peptidyl arginine deiminase, type III	0.611145	0.00014268
LOC146346	AI742940	hypothetical protein LOC146346	0.68407	0.000145128
ANP32C	NM_012403	acidic (leucine-rich) nuclear phosphoprotein 32 family, member C	0.908411	0.000166567
ATP6V0D1	AL566172	ATPase, H+ transporting, lysosomal 38kDa, V0 subunit d1	0.860788	0.000182781
C2orf37	AK021599	chromosome 2 open reading frame 37	0.71508	0.000196044
PLEKHB2	BC001428	pleckstrin homology domain containing, family B (evectins) member 2	0.703355	0.000197449
PLEKHH3	NM_024927	pleckstrin homology domain containing, family H (with MyTH4 domain) member 3	0.796155	0.000232595
ANAPC5	BF967271	anaphase promoting complex subunit 5	0.816466	0.000246682
CMBL	BE537881	carboxymethylenebutenolidase homolog (Pseudomonas)	0.769836	0.000247681
GALNT6	AW014155	UDP-N-acetyl-alpha-D-galactosamine:polypeptide N-acetylgalactosaminyltransferase 6 (GalNAc-T6)	0.953673	0.000270902
SMARCB1	AW135031	SWI	0.545277	0.000293013
SLC19A1	BC003068	solute carrier family 19 (folate transporter), member 1	0.939244	0.000324234
POLE4	AY034104	Bladder cancer-related protein (YHHQ1) gene, partial 3'UTR sequence	0.765673	0.000332612
SNF8	AA935515	SNF8, ESCRT-II complex subunit, homolog (S. cerevisiae), mRNA (cDNA clone MGC:47686 IMAGE:3900806)	0.753264	0.000339626
ATP6V1F	NM_004231	ATPase, H+ transporting, lysosomal 14kDa, V1 subunit F	0.700026	0.000352498
EIF3C	BC000533	eukaryotic translation initiation factor 3, subunit C	0.884245	0.000359133
CYFIP1	AI681536	Cytoplasmic FMR1 interacting protein 1 (CYFIP1), transcript variant 1, mRNA	0.969716	0.00036737
NIPA2	AI589507	non imprinted in Prader-Willi	0.969716	0.00036737
SCRN3	BC007344	secernin 3	0.63743	0.000367705
GTPBP5	BC040178	GTP binding protein 5 (putative)	0.925123	0.000390245
TLX3	NM_021025	T-cell leukemia homeobox 3	0.769883	0.000410722
EI24	AF131850	etoposide induced 2.4 mRNA	0.946685	0.000415723
TMEM25	AL561294	transmembrane protein 25	0.821462	0.000419657
E2F2	AL561296	E2F transcription factor 2	0.753343	0.000436639
RHOD	BC001338	ras homolog gene family, member D	0.668855	0.000444717
TIMM8A	BC005236	translocase of inner mitochondrial membrane 8 homolog A (yeast)	0.658592	0.000444774
SLC29A2	AF034102	solute carrier family 29 (nucleoside transporters), member 2	0.911087	0.000454141
ECH1	NM_001398	enoyl Coenzyme A hydratase 1, peroxisomal	0.772433	0.000457577
ASL	NM_000048	argininosuccinate lyase	0.821599	0.000489887
HMG20B	AF288679	high-mobility group 20B	0.920357	0.000503894
C20orf117	AK022023	chromosome 20 open reading frame 117	0.855367	0.00051436
NR0B1	NM_000475	nuclear receptor subfamily 0, group B, member 1	0.941098	0.000515899
NDST4	BC012326	N-deacetylase	0.844337	0.000519265
NICN1	BC005050	nicolin 1	0.821353	0.000531757
FLNA	AW051856	filamin A, alpha (actin binding protein 280)	0.943133	0.000538532
COL4A6	U04845	collagen, type IV, alpha 6	0.767751	0.000548045
C19orf61	AK022948	chromosome 19 open reading frame 61	0.808729	0.000558269
TRPM3	NM_024971	transient receptor potential cation channel, subfamily M, member 3	0.853255	0.000572156
DIS3L2	AL036541	DIS3 mitotic control homolog (S. cerevisiae)-like 2	0.824546	0.000572228
SVIP	AI150224	small VCP	0.669137	0.00058102
C19orf70	AA699669	chromosome 19 open reading frame 70	0.66888	0.00059965
ATP6V1B1	NM_001692	ATPase, H+ transporting, lysosomal 56	0.869221	0.000615582
CPT2	M58581	carnitine palmitoyltransferase II	0.850798	0.000627631
ELF5	NM_001422	E74-like factor 5 (ets domain transcription factor)	0.869603	0.0006311
MRP63	AB049957	mitochondrial ribosomal protein 63	0.866067	0.000663421
DPP7	AI620209	CDNA clone IMAGE:3623379	0.915312	0.000666421
ARPP-19	NM_006628	cyclic AMP phosphoprotein, 19 kD	0.79823	0.000679771
THRA	X55005	thyroid hormone receptor, alpha (erythroblastic leukemia viral (v-erb-a) oncogene homolog, avian)	0.916113	0.000699958
WDR24	AL136863	WD repeat domain 24	0.855846	0.000702884
TMEM11	NM_003876	transmembrane protein 11	0.743268	0.000712899
VAMP3	BC005941	vesicle-associated membrane protein 3 (cellubrevin)	0.815736	0.000741497
NCAM1	AI569787	neural cell adhesion molecule 1	0.957019	0.000748963
ZC3H10	AI969773	zinc finger CCCH-type containing 10	0.758401	0.000763332
PFAS	AL044326	phosphoribosylformylglycinamidine synthase	0.864593	0.00076409
LARP6	BF792126	La ribonucleoprotein domain family, member 6	0.8129	0.000769114
OGG1	NM_016820	8-oxoguanine DNA glycosylase	0.828027	0.000787341
ERP27	AI051248	endoplasmic reticulum protein 27 kDa	0.814042	0.000795442
PMVK	NM_006556	phosphomevalonate kinase	0.84286	0.000849612
CYB5B	NM_030579	cytochrome b5 type B (outer mitochondrial membrane)	0.908676	0.00085872
MTCH1	AF189289	mitochondrial carrier homolog 1 (C. elegans)	0.763564	0.000868009
PARD6G	AB044556	par-6 partitioning defective 6 homolog gamma (C. elegans)	0.842742	0.000870589
RPS5	NM_001009	ribosomal protein S5	0.75184	0.000888826
PLEC1	NM_000445	plectin 1, intermediate filament binding protein 500kDa	0.874536	0.000916631
RPS6	BE741754	ribosomal protein S6	0.807229	0.000923493
CLDN12	AL136770	claudin 12	0.927384	0.000963507
TSSK6	BE501922	testis-specific serine kinase 6	0.843111	0.000965247
C9orf16	NM_024112	chromosome 9 open reading frame 16	0.883971	0.000979286
FLJ13197	AF289565	hypothetical FLJ13197	0.899689	0.000985476
AHDC1	NM_015699	AT hook, DNA binding motif, containing 1	0.872638	0.000992544
ARSK	AI243677	arylsulfatase family, member K	0.895679	0.000997833
SLC6A2	BC000563	solute carrier family 6 (neurotransmitter transporter, noradrenalin), member 2	0.814463	0.00101167
PYCRL	NM_023078	pyrroline-5-carboxylate reductase-like	0.753306	0.00102052
RALY	NM_016732	RNA binding protein, autoantigenic (hnRNP-associated with lethal yellow homolog (mouse))	0.886242	0.00102499
ERCC1	NM_001983	excision repair cross-complementing rodent repair deficiency, complementation group 1 (includes overlapping antisense sequence)	0.708061	0.00103083
UBE2T	AB032931	ubiquitin-conjugating enzyme E2T (putative)	0.858527	0.00105245
EEF1G	AF119850	eukaryotic translation elongation factor 1 gamma	0.658994	0.00105247
PFTK1	AF119833	PFTAIRE protein kinase 1	0.918128	0.00107993
KIAA1984	BE728983	KIAA1984	0.78015	0.00108584
KIF26B	BC042481	kinesin family member 26B	0.737284	0.00110003
CYBRD1	AL136693	cytochrome b reductase 1	0.732541	0.00111284
WDR34	BG338983	WD repeat domain 34	0.770198	0.00114848
HABP4	AK025144	hyaluronan binding protein 4	0.779094	0.00116504
HIG2	NM_013332	hypoxia-inducible protein 2	0.809231	0.00117431
ST3GAL3	AF425863	ST3 beta-galactoside alpha-2,3-sialyltransferase 3	0.867525	0.00117773
AMIGO3	BG168290	adhesion molecule with Ig-like domain 3	0.919868	0.00118741
LOC100129961	AW514083	hypothetical protein LOC100129961	0.731633	0.0012103
C17orf81	BC002762	chromosome 17 open reading frame 81	0.851436	0.00123568
SMARCA2	AV725365	SWI	0.812288	0.00125216
PIGL	NM_004278	phosphatidylinositol glycan anchor biosynthesis, class L	0.874752	0.00125814
SLC35A4	BE618656	solute carrier family 35, member A4	0.836059	0.00125822
ZNF385B	BC038422	zinc finger protein 385B	0.798025	0.00127548
TMUB2	NM_024107	transmembrane and ubiquitin-like domain containing 2	0.86608	0.00128754
GM2A	AL513583	GM2 ganglioside activator	0.605207	0.00128779
ST6GALNAC4	AW044319	ST6 (alpha-N-acetyl-neuraminyl-2,3-beta-galactosyl-1,3)-N-acetylgalactosaminide alpha-2,6-sialyltransferase 4	0.848676	0.00129956
EML6	AA236463	echinoderm microtubule associated protein like 6	0.517411	0.0013001
AP1S1	BC003561	adaptor-related protein complex 1, sigma 1 subunit	0.806446	0.00131175
TBL3	BC002361	transducin (beta)-like 3	0.914858	0.00131671
PRPF6	AB019219	PRP6 pre-mRNA processing factor 6 homolog (S. cerevisiae)	0.96098	0.00132105
RPL12	AK026491	ribosomal protein L12	0.849987	0.00134777
LOC729926	AJ224082	similar to rCG45476	0.713252	0.00136786
CD151	NM_004357	CD151 molecule (Raph blood group)	0.793962	0.00137208
EEF1B2	NM_001959	eukaryotic translation elongation factor 1 beta 2	0.764032	0.00139427
ESPL1	D79987	extra spindle pole bodies homolog 1 (S. cerevisiae)	0.918393	0.0014076
SLITRK6	R70320	SLIT and NTRK-like family, member 6	0.966853	0.0014147
LRTOMT	AI652845	leucine rich transmembrane and 0-methyltransferase domain containing	0.643615	0.00143645
TH1L	AJ238379	TH1-like (Drosophila)	0.87615	0.0014586
PITPNM3	NM_031220	PITPNM family member 3	0.888949	0.00147068
CEND1	NM_016564	cell cycle exit and neuronal differentiation 1	0.944175	0.00150811
EIF4E2	AF047695	eukaryotic translation initiation factor 4E family member 2	0.932668	0.00154246
LOC339929	BC042414	hypothetical protein LOC339929	0.818026	0.00154949
DHX40	NM_024612	DEAH (Asp-Glu-Ala-His) box polypeptide 40	0.924729	0.00156007
C11orf2	NM_013265	chromosome 11 open reading frame2	0.727009	0.00156531
POMGNT1	NM_017739	protein O-linked mannose beta1,2-N-acetylglucosaminyltransferase	0.831301	0.001571
FAM109B	AA522720	family with sequence similarity 109, member B	0.917888	0.00157838
FAM122C	NM_138819	family with sequence similarity 122C	0.937139	0.00161916
C1orf192	AI798832	chromosome 1 open reading frame 192	0.596052	0.001627
CMTM7	AI708432	CKLF-like MARVEL transmembrane domain containing 7	0.909314	0.00166822
BOP1	AK024840	block of proliferation 1	0.857506	0.00170226
ARPC5	AL516350	actin related protein 2	0.948834	0.0017142
FGFR4	AF202063	fibroblast growth factor receptor 4	0.761805	0.00178613
TGFA	NM_003236	transforming growth factor, alpha	0.870974	0.00179639
SCAMP3	NM_005698	secretory carrier membrane protein 3	0.800646	0.00179982
PPP4R2	AI983837	protein phosphatase 4, regulatory subunit 2	0.878568	0.00183992
C17orf70	AI280446	Chromosome 17 open reading frame 70 (C17orf70), transcript variant 2, mRNA	0.89252	0.00186144
DLG5	BC002915	discs, large homolog 5 (Drosophila)	0.814968	0.00186155
FLJ20674	NM_019086	hypothetical protein FLJ20674	0.824659	0.00190372
AGPAT2	U56418	1-acylglycerol-3-phosphate O-acyltransferase 2 (lysophosphatidic acid acyltransferase, beta)	0.882451	0.00195556
ATPIF1	NM_016311	ATPase inhibitory factor 1	0.866128	0.00196424
PMEPA1	AL035541	prostate transmembrane protein, androgen induced 1	0.82981	0.00196823
PURG	NM_013357	purine-rich element binding protein G	0.967219	0.00197093
POLR2E	AI554759	polymerase (RNA) II (DNA directed) polypeptide E, 25kDa	0.780952	0.00199042
ABHD10	AI521709	abhydrolase domain containing 10	0.770544	0.00200887
TXNRD2	AB019695	thioredoxin reductase 2	0.888211	0.0020109
KBTBD10	NM_006063	kelch repeat and BTB (POZ) domain containing 10	0.859801	0.002056
AURKB	N55457	aurora kinase B	0.783848	0.00205702
PRKCSH	AI815793	protein kinase C substrate 80K-H	0.777525	0.00206916
TSPYL3	BE253715	TSPY-like 3 (pseudogene)	0.824974	0.00207853
STX10	NM_003765	syntaxin 10	0.796585	0.00211101
CDK4	NM_000075	cyclin-dependent kinase 4	0.789601	0.00211261
SSNA1	BC004118	Sjogren syndrome nuclear autoantigen 1	0.842638	0.00211266
TSEN54	BF345244	tRNA splicing endonuclease 54 homolog (S. cerevisiae)	0.885429	0.00214112
CYC1	NM_001916	cytochrome c-1	0.815285	0.00215658
FLOT1	AF117234	flotillin 1	0.860467	0.0021774
ATP5L	NM_006476	ATP synthase, H+ transporting, mitochondrial F0 complex, subunit G	0.92057	0.00218106
C2orf7	BC005069	chromosome 2 open reading frame 7	0.664166	0.00218529
SLC2A4RG	NM_020062	SLC2A4 regulator	0.80945	0.00218703
RBM14	AF315633	RNA binding motif protein 14	0.902741	0.00221861
PAK4	NM_005884	p21 protein (Cdc42	0.933341	0.00222234
OR3A1	NM_002550	olfactory receptor, family 3, subfamily A, member 1	0.912725	0.00222591
SURF1	NM_003172	surfeit 1	0.867998	0.00224603
RNF26	AL559247	ring finger protein 26	0.865602	0.00224958
BAIAP2	NM_017450	BAI1-associated protein 2	0.783537	0.00225837
LOC340947	AL117339	similar to eukaryotic translation initiation factor 3, subunit 6 interacting protein	0.65107	0.00227802
SFXN3	NM_030971	sideroflexin 3	0.813501	0.00228638
APOE	N33009	apolipoprotein E	0.854912	0.00229014
PXN	D86862	paxillin	0.950532	0.00233756
RP1	AF146592	retinitis pigmentosa 1 (autosomal dominant)	0.876334	0.00234738
CDKN2AIPNL	BC018086	CDKN2A interacting protein N-terminal like	0.500615	0.00235007
CDC42EP3	AF104857	CDC42 effector protein (Rho GTPase binding) 3	0.931835	0.00235781
VPS16	NM_022575	vacuolar protein sorting 16 homolog (S. cerevisiae)	0.835157	0.00236233
NDUFB11	NM_019056	NADH dehydrogenase (ubiquinone) 1 beta subcomplex, 11, 17.3kDa	0.679141	0.00236388
DUSP18	NM_152511	dual specificity phosphatase 18	0.957226	0.00236481
PORCN	NM_022825	porcupine homolog (Drosophila)	0.791754	0.00237555
C6orf108	NM_006443	chromosome 6 open reading frame 108	0.828235	0.00240291
HPCAL4	BE550384	hippocalcin like 4	0.79368	0.00243763
LPCAT4	AF007155	lysophosphatidylcholine acyltransferase 4	0.94791	0.00243826
ITGB4	AA808063	integrin, beta 4	0.923053	0.00246549
PRKCE	AI093546	protein kinase C, epsilon	0.718083	0.0024965
SLC25A22	NM_024698	solute carrier family 25 (mitochondrial carrier: glutamate), member 22	0.776254	0.00250681
HIST1H2AG	NM_021064	histone cluster 1, H2ag	0.888857	0.0025217
MOSC1	NM_022746	MOCO sulphurase C-terminal domain containing 1	0.858147	0.00252427
RPL32	NM_000994	ribosomal protein L32	0.694074	0.00258133
GSTM1	NM_000561	glutathione S-transferase mu 1	0.739962	0.00259168
IL17RC	BC006411	interleukin 17 receptor C	0.790321	0.00260025
CYBASC3	AA683481	cytochrome b, ascorbate dependent 3	0.780632	0.00261575
UBFD1	NM_019116	ubiquitin family domain containing 1	0.874147	0.00267147
SLC38A1	BF247552	solute carrier family 38, member 1	0.639127	0.00268072
RPL10	AL121934	ribosomal protein L10	0.808417	0.00269038
LOC652993	NM_007350	hypothetical LOC652993	0.89226	0.00271388
PHLDA1	AA576961	pleckstrin homology-like domain, family A, member 1	0.89226	0.00271388
DIP2A	NM_015151	DIP2 disco-interacting protein 2 homolog A (Drosophila)	0.896341	0.00272108
FAM24A	AI810124	family with sequence similarity 24, member A	0.917888	0.00273492
CNOT1	NM_016284	CCR4-NOT transcription complex, subunit 1	0.841779	0.00274148
CYB5R3	AF361370	cytochrome b5 reductase 3	0.716774	0.00276784
CNTNAP3	AI433163	contactin associated protein-like 3	0.932754	0.00277624
HEMK1	NM_016173	HemK methyltransferase family member 1	0.800151	0.00278453
PEX14	NM_004565	peroxisomal biogenesis factor 14	0.972592	0.00278723
HIST1H2AD	NM_003537	histone cluster 1, H2ad	0.561494	0.00283114
BOLA3	AI380704	bolA homolog 3 (E. coli)	0.934515	0.00284963
ITGAE	NM_002208	integrin, alpha E (antigen CD103, human mucosal lymphocyte antigen 1; alpha polypeptide)	0.733099	0.00286094
HGSNAT	AW328331	heparan-alpha-glucosaminide N-acetyltransferase	0.920233	0.00286666
PMCHL1	AY008411	pro-melanin-concentrating hormone-like 1	0.920106	0.00286758
UPK3B	NM_030570	uroplakin 3B	0.821181	0.00288943
CYP1A2	AF182274	cytochrome P450, family 1, subfamily A, polypeptide 2	0.970354	0.00291425
KIF1C	AB014606	kinesin family member 1C	0.766175	0.00291498
ALG5	BG940096	Asparagine-linked glycosylation 5, dolichyl-phosphate beta-glucosyltransferase homolog (S. cerevisiae) (ALG5), transcript variant 2, mRNA	0.669697	0.00292019
CPA6	NM_020361	carboxypeptidase A6	0.906343	0.00298874
CUEDC2	NM_024040	CUE domain containing 2	0.793142	0.00301065
KRT15	NM_002275	keratin 15	0.811004	0.00301681
BRI3BP	BG106919	Cervical cancer oncogene binding protein	0.59857	0.00302854
PCDHA1	AF152308	protocadherin alpha 1	0.927852	0.00302912
POLR3H	AL023553	polymerase (RNA) III (DNA directed) polypeptide H (22.9kD)	0.904694	0.00313161
CDKN2A	U38945	cyclin-dependent kinase inhibitor 2A (melanoma, p16, inhibits CDK4)	0.854695	0.00314094
LOC284889	NM_002415	hypothetical protein LOC284889	0.638756	0.00317958
PTPLA	NM_014241	protein tyrosine phosphatase-like (proline instead of catalytic arginine), member A	0.819149	0.00320903
C2orf18	BC028081	chromosome 2 open reading frame 18	0.901072	0.0032214
HSD17B8	AL031228	hydroxysteroid (17-beta) dehydrogenase 8	0.715063	0.00325767
KIAA0141	AI539425	KIAA0141	0.847963	0.0032662
RPS2	NM_002952	ribosomal protein S2	0.813862	0.0032881
MTBP	AK022122	Mdm2, transformed 3T3 cell double minute 2, p53 binding protein (mouse) binding protein, 104kDa	0.616566	0.00329728
NR2F2	AL037401	nuclear receptor subfamily 2, group F, member 2	0.935916	0.00331034
MPPED1	NM_001585	metallophosphoesterase domain containing 1	0.926149	0.00331481
KLHL20	AA808694	kelch-like 20 (Drosophila)	0.897975	0.00332049
MGC2752	AI015612	hypothetical LOC65996	0.945543	0.00334389
CDK10	AF153430	cyclin-dependent kinase 10	0.874757	0.00337593
CENPM	NM_024053	centromere protein M	0.56935	0.00338284
KIAA1324	AB037745	KIAA1324	0.957942	0.00339292
M6PRBP1	NM_005817	mannose-6-phosphate receptor binding protein 1	0.779213	0.00342843
NDUFB2	NM_004546	NADH dehydrogenase (ubiquinone) 1 beta subcomplex, 2, 8kDa	0.709533	0.00343829
ZDHHC19	NM_144637	zinc finger, DHHC-type containing 19	0.910818	0.00347594
MON1A	BC006299	MON1 homolog A (yeast)	0.866548	0.00349373
TMCO6	NM_018502	transmembrane and coiled-coil domains 6	0.877994	0.00351141
LAMA3	AL708055	laminin, alpha 3	0.891533	0.003523
ANXA6	NM_001155	annexin A6	0.863318	0.00353623
CYP51A1	NM_000786	cytochrome P450, family 51, subfamily A, polypeptide 1	0.79592	0.00354786
TWF2	NM_007284	twinfilin, actin-binding protein, homolog 2 (Drosophila)	0.873787	0.00355427
CPSF1	BE676642	cleavage and polyadenylation specific factor 1, 160kDa	0.950032	0.00357952
HTRA2	NM_013247	HtrA serine peptidase 2	0.843298	0.00358641
AKR7A2	NM_003689	aldo-keto reductase family 7, member A2 (aflatoxin aldehyde reductase)	0.678389	0.00359945
PVRL1	AW139723	poliovirus receptor-related 1 (herpesvirus entry mediator C)	0.866694	0.00360583
CLTC	AF130062	clathrin, heavy chain (Hc)	0.967153	0.00362832
YPEL2	AW005748	yippee-like 2 (Drosophila)	0.815401	0.00365169
GPATCH4	BE546897	G patch domain containing 4	0.750556	0.0036897
ISCA1	BG387555	iron-sulfur cluster assembly 1 homolog (S. cerevisiae)	0.862366	0.00369144
LOC90379	AI073983	hypothetical protein BC002926	0.885371	0.00369755
NADSYN1	NM_018161	NAD synthetase 1	0.888132	0.00370565
RFPL1	NM_021026	ret finger protein-like 1	0.91919	0.003776
TRIM69	AA969929	tripartite motif-containing 69	0.91647	0.00377798
CNIH3	AI142850	Cornichon homolog 3 (Drosophila) (CNIH3), mRNA	0.733189	0.00378308
EAF2	NM_018456	ELL associated factor 2	0.906542	0.00381954
ANGEL1	AA609379	Angel homolog 1 (Drosophila) (ANGEL1), mRNA	0.929115	0.00386592
PROM2	AK091175	prominin 2	0.647015	0.00388136
SLC46A1	AL832613	solute carrier family 46 (folate transporter), member 1	0.842783	0.00388972
SLC10A7	AI963571	solute carrier family 10 (sodium	0.628906	0.00391794
MMS19	NM_022362	MMS19 nucleotide excision repair homolog (S. cerevisiae)	0.86991	0.0039668
REEP4	NM_025232	receptor accessory protein 4	0.901079	0.00396681
PTGER3	L27489	prostaglandin E receptor 3 (subtype EP3)	0.740676	0.00398447
SYT9	BC029605	synaptotagmin IX	0.915437	0.00399018
ARSD	AU144083	arylsulfatase D	0.803971	0.00399426
RAB34	AF327350	RAB34, member RAS oncogene family	0.834044	0.00400989
INPP5J	AI935720	inositol polyphosphate-5-phosphatase J	0.921087	0.00406889
MERTK	L08961	c-mer proto-oncogene tyrosine kinase	0.811113	0.0040847
CYB5RL	BF438410	cytochrome b5 reductase-like	0.750256	0.00408936
PSENEN	NM_018468	presenilin enhancer 2 homolog (C. elegans)	0.758978	0.00410755
RP11-345P4.4	BE885244	similar to solute carrier family 35, member E2	0.769825	0.00411431
DFFA	AF087573	DNA fragmentation factor, 45kDa, alpha polypeptide	0.821309	0.00411486
RPL22	AW071997	ribosomal protein L22	0.817688	0.00413064
NECAB3	AF193759	N-terminal EF-hand calcium binding protein 3	0.744154	0.00413142
NAGA	M29276	N-acetylgalactosaminidase, alpha-	0.767117	0.00413425
NFS1	NM_021100	NFS1 nitrogen fixation 1 homolog (S. cerevisiae)	0.91042	0.00417059
PIGQ	BC010094	phosphatidylinositol glycan anchor biosynthesis, class Q	0.753137	0.00418355
C11orf75	NM_020179	chromosome 11 open reading frame 75	0.903324	0.00418805
MRPS18B	BC005373	mitochondrial ribosomal protein S18B	0.814053	0.00418993
MFAP2	NM_017459	microfibrillar-associated protein 2	0.779278	0.00420301
PMS2L1	NM_005394	postmeiotic segregation increased 2-like 1 pseudogene	0.90024	0.00420321
CAPN1	NM_005186	calpain 1, (mu	0.860953	0.0042119
ANP32A	T67821	Cerebellar leucine rich acidic nuclear protein (LANP)	0.909136	0.00426046
TSPAN14	BF025955	tetraspanin 14	0.828962	0.00426861
CDKAL1	BE794663	CDK5 regulatory subunit associated protein 1-like 1	0.747389	0.00427624
CD44	U94903	CDw44 antigen	0.598916	0.00430122
STARD13	AI346280	StAR-related lipid transfer (START) domain containing 13	0.856413	0.00430146
BCAT2	AK023909	branched chain aminotransferase 2, mitochondrial	0.671372	0.00436332
FAM64A	BC005004	family with sequence similarity 64, member A	0.720716	0.00436947
MICALL1	BC001090	MICAL-like 1	0.925738	0.00441597
IGF2BP3	BC019258	insulin-like growth factor 2 mRNA binding protein 3	0.407407	0.00442069
ARPC2	AF279893	actin related protein 2	0.858012	0.00443412
ACTR1A	NM_005736	ARP1 actin-related protein 1 homolog A, centractin alpha (yeast)	0.801222	0.00446017
ZNF614	NM_025040	zinc finger protein 614	0.927983	0.00447278
EPN3	NM_017957	epsin 3	0.817656	0.00447431
FAM120A	BE963765	family with sequence similarity 120A	0.931016	0.00451647
EFNB2	BF001670	ephrin-B2	0.959735	0.00456
TINF2	BC005030	TERF1 (TRF1)-interacting nuclear factor 2	0.814889	0.00456219
HJURP	NM_018410	Holliday junction recognition protein	0.872549	0.00458243
RPS4X	NM_001007	ribosomal protein S4, X-linked	0.797107	0.00460959
MED12	NM_005120	mediator complex subunit 12	0.892652	0.00466017
CLDN14	AF314090	claudin 14	0.913485	0.00470982
FDX1L	AI453531	ferredoxin 1-like	0.922801	0.0047158
SERP1	BG107676	stress-associated endoplasmic reticulum protein 1	0.937494	0.00474931
LRRC57	AW135740	leucine rich repeat containing 57	0.446281	0.00475054
TBCD	AW247323	tubulin folding cofactor D	0.805106	0.00476695
DCTN1	NM_004082	dynactin 1 (p150, glued homolog, Drosophila)	0.756192	0.00483611
CYP2R1	AV700558	cytochrome P450, family 2, subfamily R, polypeptide 1	0.846059	0.0048397
EMR2	NM_013447	egf-like module containing, mucin-like, hormone receptor-like 2	0.890247	0.00486086
LUC7L	AY005111	LUC7-like (S. cerevisiae)	0.930114	0.00487526
GOLGA6	AI073403	golgi autoantigen, golgin subfamily a, 6	0.909778	0.00488513
COPG	NM_016128	coatomer protein complex, subunit gamma	0.902417	0.00488588
COX8A	NM_004074	cytochrome c oxidase subunit 8A (ubiquitous)	0.646651	0.00489391
PACSIN1	AF242529	protein kinase C and casein kinase substrate in neurons 1	0.865438	0.0049134
OAZ1	D87914	ornithine decarboxylase antizyme 1	0.90276	0.00492272
KCNS3	NM_002252	potassium voltage-gated channel, delayed-rectifier, subfamily S, member 3	0.937388	0.00493665
TMEM126B	BC017574	transmembrane protein 126B	0.920977	0.00495829
hCG_2003956	AL031295	hCG2003956	0.913849	0.00496722
SDC2	BE048514	syndecan 2	0.778012	0.00497386
RPL3	NM_000967	ribosomal protein L3	0.759011	0.00499656
TBC1D28	AL137747	TBC1 domain family, member 28	0.898091	0.00501181
FLJ40296	AK097615	FLJ40296 protein	0.897527	0.00501392
MDH2	AL520774	malate dehydrogenase 2, NAD (mitochondrial)	0.919684	0.00502303
TMEM85	BC002583	transmembrane protein 85	0.934689	0.00503379
MAZ	AI471665	MYC-associated zinc finger protein (purine-binding transcription factor)	0.994492	0.00503396
MPND	AC007292	MPN domain containing	0.825644	0.00503995
ATF6B	AU117487	activating transcription factor 6 beta	0.895622	0.00504561
MAP3K5	NM_005923	mitogen-activated protein kinase kinase kinase 5	0.898324	0.00507795
SMEK2	BC032531	SMEK homolog 2, suppressor of mek1 (Dictyostelium)	0.829395	0.005088
EIF3D	NM_003753	eukaryotic translation initiation factor 3, subunit D	0.947485	0.00513264
CTSF	NM_003793	cathepsin F	0.883164	0.00517664
HIST1H2BC	NM_003522	histone cluster 1, H2bc	0.827099	0.00521506
H19	BF569051	H19, imprinted maternally expressed transcript (non-protein coding)	0.927502	0.00522844
GNAO1	BE670563	guanine nucleotide binding protein (G protein), alpha activating activity polypeptide O	0.855396	0.00524789
C2CD2	AP001745	C2 calcium-dependent domain containing 2	0.855851	0.00525208
ACER1	NM_133492	alkaline ceramidase 1	0.667723	0.00525575
HIST1H2AB	NM_021052	histone cluster 1, H2ab	0.680075	0.00529104
BRCC3	S72931	BRCA1	0.944099	0.00529649
ABCA8	AK090894	ATP-binding cassette, sub-family A (ABC1), member 8	0.950005	0.00532032
C15orf41	AK026504	chromosome 15 open reading frame 41	0.931874	0.00533889
RPLP0	AA555113	ribosomal protein, large, P0	0.746756	0.00535683
RPS24	AK094613	Ribosomal protein S24 (RPS24), transcript variant b, mRNA	0.845651	0.00540994
NAGK	NM_017567	N-acetylglucosamine kinase	0.845952	0.00541281
NUBP2	NM_012225	nucleotide binding protein 2 (MinD homolog, E. coli)	0.778934	0.00541474
NPAL3	NM_020448	NIPA-like domain containing 3	0.713657	0.00544683
GPLD1	L11702	glycosylphosphatidylinositol specific phospholipase D1	0.939609	0.00547897
FBXL12	NM_017703	F-box and leucine-rich repeat protein 12	0.961389	0.00551049
MAP2K2	AI762811	mitogen-activated protein kinase kinase 2	0.878336	0.00552039
TUBB4Q	U83110	tubulin, beta polypeptide 4, member Q	0.843518	0.00552374
CCNF	NM_001761	cyclin F	0.869357	0.00552867
MCM3	NM_002388	minichromosome maintenance complex component 3	0.741523	0.00553979
PRPF8	NM_006445	PRP8 pre-mRNA processing factor 8 homolog (S. cerevisiae)	0.92367	0.00555355
ADAMTS5	BI254089	ADAM metallopeptidase with thrombospondin type 1 motif, 5	0.950486	0.00555943
ABHD2	NM_007011	abhydrolase domain containing 2	0.694453	0.00557182
MGAT4B	NM_014275	mannosyl (alpha-1,3-)-glycoprotein beta-1,4-N-acetylglucosaminyltransferase, isozyme B	0.934519	0.00557618
ABCC12	AF395909	ATP-binding cassette, sub-family C (CFTR	0.954853	0.00560168
RCBTB1	BC038104	regulator of chromosome condensation (RCC1) and BTB (POZ) domain containing protein 1	0.863025	0.00561365
PDHB	M34055	pyruvate dehydrogenase (lipoamide) beta	0.846175	0.00562024
HIST1H4A	BE740761	histone cluster 1, H4a	0.779311	0.00563155
C20orf74	AL121896	chromosome 20 open reading frame 74	0.857895	0.00564692
LOC253264	AK023445	hypothetical protein LOC253264	0.923506	0.00565692
TADA3L	AK024982	transcriptional adaptor 3 (NGG1 homolog, yeast)-like	0.905339	0.00565937
SQLE	AF098865	squalene epoxidase	0.885184	0.00569851
TAZ	X92762	tafazzin	0.853759	0.00571033
GRHPR	NM_012203	glyoxylate reductase	0.76154	0.00571631
TMEM147	NM_006326	transmembrane protein 147	0.712646	0.00572625
GGCX	NM_000821	gamma-glutamyl carboxylase	0.681143	0.0057677
WWC3	AB033106	WWC family member 3	0.768882	0.00578584
RPL10A	NM_007104	ribosomal protein L10a	0.8716	0.00578656
SBF1	U93181	SET binding factor 1	0.830084	0.00579376
TIRAP	NM_052887	toll-interleukin 1 receptor (TIR) domain containing adaptor protein	0.894487	0.0058124
ACP1	BE872974	acid phosphatase 1, soluble	0.878721	0.00581952
WRB	NM_004627	tryptophan rich basic protein	0.884406	0.00582178
TUBA1B	BC006481	tubulin, alpha 1b	0.92504	0.00584122
KIR2DL4	AF276292	killer cell immunoglobulin-like receptor, two domains, long cytoplasmic tail, 4	0.913404	0.00591079
COQ6	NM_015940	coenzyme Q6 homolog, monooxygenase (S. cerevisiae)	0.844766	0.00593551
DDT	NM_001355	D-dopachrome tautomerase	0.830446	0.00594818
TRIM41	AI743109	tripartite motif-containing 41	0.872059	0.00594987
IPO9	AW075415	importin 9	0.772627	0.00597405
FN3KRP	NM_024619	fructosamine-3-kinase-related protein	0.77726	0.00597657
RPS14	AI734124	ribosomal protein S14	0.917576	0.00599106
DIAPH1	AU158818	diaphanous homolog 1 (Drosophila)	0.376471	0.00600513
PGRMC1	NM_006667	progesterone receptor membrane component 1	0.87674	0.00601036
ACTR2	BE566290	ARP2 actin-related protein 2 homolog (yeast)	0.836451	0.00602319
NARS	NM_004539	asparaginyl-tRNA synthetase	0.934905	0.00606725
EEF1A1	BE786672	eukaryotic translation elongation factor 1 alpha 1	0.86689	0.00613331
C19orf52	AL521284	chromosome 19 open reading frame 52	0.914356	0.00613768
PREB	NM_013388	prolactin regulatory element binding	0.919888	0.00614666
LOC400622	BC040189	hypothetical LOC400622	0.942405	0.006176
FBXO18	BE961916	F-box protein, helicase, 18	0.958965	0.0061981
PLCXD1	BE675241	phosphatidylinositol-specific phospholipase C, X domain containing 1	0.764489	0.00620827
WSB2	NM_018639	WD repeat and SOCS box-containing 2	0.769214	0.00622341
LPPR2	AA209463	lipid phosphate phosphatase-related protein type 2	0.741304	0.00629572
RPS3	U14990	ribosomal protein S3	0.866252	0.00630048
SHKBP1	AI348000	SH3KBP1 binding protein 1	0.751556	0.00631957
ARHGAP10	NM_024605	Rho GTPase activating protein 10	0.862962	0.00633519
SLC22A9	AI040384	solute carrier family 22 (organic anion transporter), member 9	0.953773	0.00635787
KCNQ1OT1	BF592986	KCNQ1 overlapping transcript 1 (non-protein coding)	0.880328	0.00636535
PTPRS	BC029496	protein tyrosine phosphatase, receptor type, S	0.806269	0.00637044
RAB33B	NM_031296	RAB33B, member RAS oncogene family	0.863959	0.00637755
GFER	AF124604	growth factor, augmenter of liver regeneration	0.944012	0.00638458
S100A1	NM_006271	S100 calcium binding protein A1	0.873033	0.00641819
UBA52	AF348700	ubiquitin A-52 residue ribosomal protein fusion product 1	0.890171	0.00643013
ATP8B2	AB032963	ATPase, class I, type 8B, member 2	0.848834	0.00648305
ZDHHC5	AK023130	zinc finger, DHHC-type containing 5	0.966847	0.00649997
PIGV	NM_017837	phosphatidylinositol glycan anchor biosynthesis, class V	0.926413	0.00651016
SIDT2	NM_015996	SID1 transmembrane family, member 2	0.871328	0.0065276
JPH1	NM_020647	junctophilin 1	0.707054	0.00657322
TMED2	NM_006815	transmembrane emp24 domain trafficking protein 2	0.911824	0.00658752
EEF2	NM_001961	eukaryotic translation elongation factor 2	0.761451	0.00659078
TRAPPC1	BG340967	trafficking protein particle complex 1	0.90821	0.00660654
ISYNA1	AL137749	inositol-3-phosphate synthase 1	0.684849	0.00662745
ADRA1D	M76446	adrenergic, alpha-1D-, receptor	0.946419	0.0066305
SREBF2	NM_004599	sterol regulatory element binding transcription factor 2	0.821536	0.00664937
DPAGT1	BC000325	dolichyl-phosphate (UDP-N-acetylglucosamine) N-acetylglucosaminephosphotransferase 1 (GlcNAc-1-P transferase)	0.871797	0.00666627
TSPO	NM_000714	translocator protein (18kDa)	0.640842	0.00666816
UNC84B	AL021707	unc-84 homolog B (C. elegans)	0.775713	0.00667291
FAM134A	NM_024293	family with sequence similarity 134, member A	0.734965	0.0067001
C10orf44	BC033403	chromosome 10 open reading frame 44	0.923741	0.00670027
FICD	NM_007076	FIC domain containing	0.94286	0.00670858
SKIV2L	NM_006929	superkiller viralicidic activity 2-like (S. cerevisiae)	0.921464	0.00671633
SEMA4G	NM_017893	sema domain, immunoglobulin domain (Ig), transmembrane domain (TM) and short cytoplasmic domain, (semaphorin) 4G	0.639047	0.00675066
CHAF1B	NM_005441	chromatin assembly factor 1, subunit B (p60)	0.826688	0.00675981
BNIPL	NM_138279	BCL2	0.743454	0.00676472
EXOSC4	AL039469	exosome component 4	0.809309	0.00678198
PLAC1	NM_021796	placenta-specific 1	0.90287	0.00678527
ASB6	BC001719	ankyrin repeat and SOCS box-containing 6	0.932361	0.0067874
ABHD11	AI923458	abhydrolase domain containing 11	0.839634	0.00686312
IMP4	BE747342	IMP4, U3 small nucleolar ribonucleoprotein, homolog (yeast)	0.867802	0.00686933
LOC645513	BC037908	CDNA clone IMAGE:5276804	0.875219	0.00690986
HERC4	AK026808	hect domain and RLD 4	0.942675	0.00693852
NDUFC1	NM_002494	NADH dehydrogenase (ubiquinone) 1, subcomplex unknown, 1, 6kDa	0.657167	0.00693985
LSMD1	BC006407	LSM domain containing 1	0.76856	0.007018
TRIM2	BC005016	tripartite motif-containing 2	0.846333	0.00703224
GATAD1	H48897	GATA zinc finger domain containing 1	0.831744	0.00706413
S1PR5	AF317676	sphingosine-1-phosphate receptor 5	0.827735	0.00707862
TAF6L	AI497781	TAF6-like RNA polymerase II, p300	0.880655	0.00709664
JMJD2B	AK026040	jumonji domain containing 2B	0.884395	0.00710141
POLD2	NM_006230	polymerase (DNA directed), delta 2, regulatory subunit 50kDa	0.734694	0.00710163
ALDH3B1	BC002553	aldehyde dehydrogenase 3 family, member B1	0.86555	0.00712592
CTBP1	AL137653	C-terminal binding protein 1	0.869234	0.00712707
ZNF621	AK074366	zinc finger protein 621	0.816818	0.0071322
TRAK1	J03068	trafficking protein, kinesin binding 1	0.783948	0.00713415
KAT2A	NM_021078	K(lysine) acetyltransferase 2A	0.919489	0.0071846
SLC35A3	BC005136	solute carrier family 35 (UDP-N-acetylglucosamine (UDP-GlcNAc) transporter), member A3	0.833556	0.00721179
BICD2	AI934125	bicaudal D homolog 2 (Drosophila)	0.790513	0.00724101
DNAH3	Z83805	dynein, axonemal, heavy chain 3	0.732674	0.00726151
DOM3Z	AL049547	dom-3 homolog Z (C. elegans)	0.931884	0.00727194
SUV420H2	BC005842	suppressor of variegation 4-20 homolog 2 (Drosophila)	0.923444	0.00727759
C18orf24	BF038461	chromosome 18 open reading frame 24	0.726555	0.00730419
ING4	NM_016162	inhibitor of growth family, member 4	0.777996	0.00731302
PRDX2	AU147942	peroxiredoxin 2	0.884637	0.00734649
LOC400620	BC035399	hypothetical LOC400620	0.838883	0.007347
HMGA1	AF176039	high mobility group AT-hook 1	0.953248	0.00737816
SRD5A1	AF113128	steroid-5-alpha-reductase, alpha polypeptide 1 (3-oxo-5 alpha-steroid delta 4-dehydrogenase alpha 1)	0.794607	0.00743264
PDRG1	AL031658	p53 and DNA damage regulated 1	0.706179	0.00744518
TWSG1	NM_020648	twisted gastrulation homolog 1 (Drosophila)	0.88196	0.00744614
ZFP36L2	BF589368	ERF-2 mRNA	0.928762	0.00749548
EPHB6	NM_004445	EPH receptor B6	0.952266	0.00753653
SERINC3	U49188	serine incorporator 3	0.915174	0.00755245
SLC25A15	BC002702	solute carrier family 25 (mitochondrial carrier; ornithine transporter) member 15	0.732241	0.0075561
EPHB3	X75208	EPH receptor B3	0.838708	0.00756829
TENC1	AB028998	tensin like C1 domain containing phosphatase (tensin 2)	0.909797	0.00764796
CUTA	AF230924	cutA divalent cation tolerance homolog (E. coli)	0.838471	0.00765426
C16orf5	AF195661	chromosome 16 open reading frame 5	0.869273	0.00767472
GOLGA2	L06147	golgi autoantigen, golgin subfamily a, 2	0.941508	0.00768715
ZNF789	AW274112	zinc finger protein 789	0.771061	0.00770689
SMPX	NM_014332	small muscle protein, X-linked	0.84122	0.00772786
PRMT2	AI928367	protein arginine methyltransferase 2	0.970973	0.00773165
EHF	NM_012153	ets homologous factor	0.914526	0.00773508
ZDHHC18	AL034380	zinc finger, DHHC-type containing 18	0.85887	0.00774074
LOC652968	AI742029	hypothetical protein LOC652968	0.764115	0.00774082
PLK1	NM_005030	polo-like kinase 1 (Drosophila)	0.858468	0.00775824
CYP19A1	BC035714	cytochrome P450, family 19, subfamily A, polypeptide 1	0.857309	0.00776212
FAM83H	AW207504	family with sequence similarity 83, member H	0.884717	0.00776212
FLJ90757	BG030541	hypothetical protein LOC440465	0.918993	0.00776212
TMPRSS13	AB048797	transmembrane protease, serine 13	0.94737	0.00778956
PACSIN3	NM_016223	protein kinase C and casein kinase substrate in neurons 3	0.775603	0.0077914
MEA1	NM_014623	male-enhanced antigen 1	0.84123	0.00783656
RNF157	BC042501	ring finger protein 157	0.8323	0.00784408
AKT1	NM_005163	v-akt murine thymoma viral oncogene homolog 1	0.937084	0.00788354
TTC17	AU144301	Tetratricopeptide repeat domain 17, mRNA (cDNA clone MGC:26168 IMAGE:4830377)	0.901302	0.00792309
C16orf55	AI655320	chromosome 16 open reading frame 55	0.818897	0.00792372
SNORD114-3	AU146318	small nucleolar RNA, C	0.691063	0.00792779
MGC40069	AI684979	T-cell receptor active alpha-chain V-region (V-J-C) mRNA, partial cds, clone AE11	0.783784	0.00795609
KDELR1	BC008958	KDEL (Lys-Asp-Glu-Leu) endoplasmic reticulum protein retention receptor 1	0.890394	0.00796641
GPR52	NM_005684	G protein-coupled receptor 52	0.944633	0.00800307
DCTN3	NM_007234	dynactin 3 (p22)	0.762885	0.00800339
ARL4C	N74140	ADP-ribosylation factor-like protein 7 (ARL7)	0.809295	0.00802292
DHCR24	NM_014762	24-dehydrocholesterol reductase	0.757863	0.00803444
C5orf13	NM_004772	chromosome 5 open reading frame 13	0.756511	0.00804263
SLC31A2	NM_001860	solute carrier family 31 (copper transporters), member 2	0.887202	0.00804384
RPS27A	AW013893	ribosomal protein S27a	0.88195	0.00804454
C13orf26	AI204541	chromosome 13 open reading frame 26	0.796062	0.0080475
ACAD10	AL530994	acyl-Coenzyme A dehydrogenase family, member 10	0.686727	0.0080502
EPN1	NM_013333	epsin 1	0.924507	0.0080932
BSND	NM_057176	Bartter syndrome, infantile, with sensorineural deafness (Barttin)	0.844787	0.00809774
NDUFB8	NM_005004	NADH dehydrogenase (ubiquinone) 1 beta subcomplex, 8, 19kDa	0.912101	0.00812307
NDUFB8	NM_005004	NADH dehydrogenase (ubiquinone) 1 beta subcomplex, 8, 19kDa	0.912101	0.00812307
REEP6	AI348159	receptor accessory protein 6	0.681612	0.00813389
DNAJB1	BG537255	DnaJ (Hsp40) homolog, subfamily B, member 1	0.923555	0.00813495
NIT1	NM_005600	nitrilase 1	0.70165	0.00813631
DAOA	AY170471	D-amino acid oxidase activator	0.951533	0.00816487
PTGES	AF010316	prostaglandin E synthase	0.80054	0.00817033
TRAF7	AL136921	TNF receptor-associated factor 7	0.918956	0.00817899
YBX1	X96666	Y box binding protein 1	0.956869	0.00818338
SYK	NM_003177	spleen tyrosine kinase	0.92267	0.00819316
SND1	NM_014390	staphylococcal nuclease and tudor domain containing 1	0.890139	0.00821436
CBX2	AW769671	chromobox homolog 2 (Pc class homolog, Drosophila)	0.883372	0.00824453
CTAGE1	NM_022663	cutaneous T-cell lymphoma-associated antigen 1	0.954595	0.00826593
PON2	AI042220	paraoxonase 2	0.827786	0.00827589
VISA	AI885294	virus-induced signaling adapter	0.682851	0.00829284
SFRS11	AU146237	splicing factor, arginine	0.972488	0.00829923
OSGIN1	NM_013370	oxidative stress induced growth inhibitor 1	0.63266	0.00832338
TUBB	BC005838	tubulin, beta	0.907724	0.00833823
TMEM134	AY007143	transmembrane protein 134	0.696746	0.00838824
DIRC2	AI147467	disrupted in renal carcinoma 2	0.955905	0.00839741
TUBG1	NM_001070	tubulin, gamma 1	0.836845	0.00840362
NENF	AI984136	neuron derived neurotrophic factor	0.8802	0.00841813
LYPLA2	NM_007260	lysophospholipase II	0.874001	0.0084213
CRTAP	NM_006371	cartilage associated protein	0.922693	0.00842386
EIF3F	NM_003754	eukaryotic translation initiation factor 3, subunit F	0.733402	0.0084409
RCCD1	AW007826	RCC1 domain containing 1	0.877897	0.00845344
GLIS2	AA705182	GLIS family zinc finger 2	0.770435	0.00846174
ARMCX2	NM_014782	armadillo repeat containing, X-linked 2	0.946727	0.0084998
ZNF587	NM_017961	zinc finger protein 587	0.927986	0.00850028
ADAM15	BM973999	ADAM metallopeptidase domain 15	0.742828	0.00851282
FAM20B	NM_014864	family with sequence similarity 20, member B	0.816812	0.00854063
SNX8	AF121858	sorting nexin 8	0.89887	0.0085434
HBXIP	NM_006402	hepatitis B virus x interacting protein	0.954525	0.0085682
NDUFA7	NM_005001	NADH dehydrogenase (ubiquinone) 1 alpha subcomplex, 7, 14.5kDa	0.71447	0.00856975
SMARCA4	AI831675	SWI	0.957928	0.00857915
CD99	NM_002414	CD99 molecule	0.872022	0.00858959
SENP8	AW173305	SUMO	0.785446	0.00859235
IPP	NM_005897	intracisternal A particle-promoted polypeptide	0.77987	0.00859545
AGPAT3	NM_020132	1-acylglycerol-3-phosphate O-acyltransferase 3	0.970404	0.00860514
EGFR	U48722	epidermal growth factor receptor (erythroblastic leukemia viral (v-erb-b) oncogene homolog, avian)	0.96118	0.00861
DNAJC4	NM_005528	DnaJ (Hsp40) homolog, subfamily C, member 4	0.802518	0.00865628
SLC25A39	AF317711	solute carrier family 25, member 39	0.767256	0.00866646
FAM162A	AF201944	family with sequence similarity 162, member A	0.934998	0.00869975
ZNF668	N94321	zinc finger protein 668	0.845791	0.00871563
PLAC9	AI275020	placenta-specific 9	0.621145	0.0087198
RPL8	NM_000973	ribosomal protein L8	0.847983	0.00872461
RPS8	NM_001012	ribosomal protein S8	0.759348	0.00874287
LRIG1	AB050468	leucine-rich repeats and immunoglobulin-like domains 1	0.696666	0.00874706
NDUFA13	NM_015965	NADH dehydrogenase (ubiquinone) 1 alpha subcomplex, 13	0.864503	0.00874917
SCRN1	NM_014766	secernin 1	0.792372	0.00881419
CHMP2A	NM_014453	chromatin modifying protein 2A	0.848965	0.00884712
RPS28	BF431363	ribosomal protein S28	0.862029	0.00887356
FTSJ2	NM_013393	FtsJ homolog 2 (E. coli)	0.818637	0.00889709
CPVL	NM_031311	carboxypeptidase, vitellogenic-like	0.909775	0.00891818
PDCL2	AW139167	phosducin-like 2	0.74644	0.00893508
GSN	NM_000177	gelsolin (amyloidosis, Finnish type)	0.872969	0.0089481
WIPI1	NM_017983	WD repeat domain, phosphoinositide interacting 1	0.78985	0.00898568
TPT1	AF072098	tumor protein, translationally-controlled 1	0.808457	0.00900515
CD9	AK025016	MRP-1	0.967352	0.00900637
MEGF9	W68084	multiple EGF-like-domains 9	0.836789	0.00900704
ADCK4	AI526074	aarF domain containing kinase 4	0.84782	0.00902201
TUBG2	NM_016437	tubulin, gamma 2	0.89117	0.00906403
MAPK13	BC000433	mitogen-activated protein kinase 13	0.864694	0.00907953
ATP13A2	NM_022089	ATPase type 13A2	0.677362	0.00913626
TTTY6	AF332237	testis-specific transcript, Y-linked 6	0.852465	0.00913955
UBE2D2	BE621259	ubiquitin-conjugating enzyme E2D 2 (UBC4	0.880505	0.00915489
CENPA	NM_001809	centromere protein A	0.910494	0.00916207
APEH	NM_001640	N-acylaminoacyl-peptide hydrolase	0.806365	0.00917169
C9orf86	BC002945	chromosome 9 open reading frame 86	0.899586	0.00917236
ARVCF	NM_001670	armadillo repeat gene deletes in velocardiofacial syndrome	0.935795	0.00917947
C16orf61	NM_020188	chromosome 16 open reading frame 61	0.851782	0.00918176
DHRS1	AL050217	dehydrogenase	0.746703	0.00920581
RPS25	AA888388	ribosomal protein S25	0.881985	0.00923893
STARD3	NM_006804	StAR-related lipid transfer (START) domain containing 3	0.845986	0.00928149
HEXIM2	N93663	Hexamthylene bis-acetamide inducible 2, mRNA (cDNA clone MGC:10788 IMAGE:3609101)	0.848569	0.00928751
PLD2	AF033850	phospholipase D2	0.977067	0.00929764
CDKN2D	U20498	cyclin-dependent kinase inhibitor 2D (p19, inhibits CDK4)	0.773779	0.00929862
RNF40	BF439210	ring finger protein 40	0.811674	0.00930466
MMAB	AV702487	methylmalonic aciduria (cobalamin deficiency) cblB type	0.861734	0.00931851
CREBL2	AL529409	cAMP responsive element binding protein-like 2	0.66744	0.00933221
MIF4GD	AF225422	MIF4G domain containing	0.837415	0.00933928
ITPK1	AF279372	inositol 1,3,4-triphosphate 5	0.79587	0.00934023
LOC92249	AU154785	hypothetical LOC92249	0.857867	0.00934088
AHCYL1	NM_014121	S-adenosylhomocysteine hydrolase-like 1	0.946478	0.00942763
PTK6	NM_005975	PTK6 protein tyrosine kinase 6	0.89968	0.00945311
PIAS3	NM_006099	protein inhibitor of activated STAT, 3	0.867469	0.00946612
DCTPP1	NM_024096	dCTP pyrophosphatase 1	0.837041	0.00947004
DACT1	NM_016651	dapper, antagonist of beta-catenin, homolog 1 (Xenopus laevis)	0.907289	0.00949222
FIBP	NM_004214	fibroblast growth factor (acidic) intracellular binding protein	0.76452	0.00950219
ABHD1	AI554273	abhydrolase domain containing 1	0.804031	0.00952826
LSM4	NM_012321	LSM4 homolog, U6 small nuclear RNA associated (S. cerevisiae)	0.817637	0.00957672
FAH	NM_000137	fumarylacetoacetate hydrolase (fumarylacetoacetase)	0.877733	0.00958293
ALDH4A1	U24267	aldehyde dehydrogenase 4 family, member A1	0.802379	0.00959361
MARCH8	AA770170	membrane-associated ring finger (C3HC4) 8	0.809726	0.00962199
CPEB3	BC036444	cytoplasmic polyadenylation element binding protein 3	0.775053	0.00963661
NPHP1	BF216535	nephronophthisis 1 (juvenile)	0.604472	0.00963794
LRRC23	NM_006992	leucine rich repeat containing 23	0.849959	0.0096428
LOC100133072	BC010931	hypothetical protein LOC100133072	0.888711	0.00966784
GPN2	NM_018066	GPN-loop GTPase 2	0.780012	0.00967774
POMT1	NM_007171	protein-O-mannosyltransferase 1	0.844617	0.00968588
B3GAT3	AB009598	beta-1,3-glucuronyltransferase 3 (glucuronosyltransferase I)	0.821008	0.00969195
PEA15	BC002426	phosphoprotein enriched in astrocytes 15	0.757106	0.00973038
PEMT	NM_007169	phosphatidylethanolamine N-methyltransferase	0.812569	0.00974538
PGAM1	NM_002629	phosphoglycerate mutase 1 (brain)	0.895826	0.00975318
PIP	NM_002652	prolactin-induced protein	0.748571	0.0097597
MRPL12	NM_002949	mitochondrial ribosomal protein L12	0.878627	0.00976776
ARAP3	AI660186	ArfGAP with RhoGAP domain, ankyrin repeat and PH domain 3	0.736709	0.00979106
PEX6	D83703	peroxisomal biogenesis factor 6	0.748853	0.00979254
LOC100129828	AI681915	hypothetical protein LOC100129828	0.864739	0.00980565
LOC93622	AL562398	hypothetical LOC93622	0.846455	0.00981293
PPP4C	BC001416	protein phosphatase 4 (formerly X), catalytic subunit	0.930225	0.00983685
IP6K1	BE614199	inositol hexakisphosphate kinase 1	0.927035	0.00985032
VAMP1	NM_016830	vesicle-associated membrane protein 1 (synaptobrevin 1)	0.889202	0.0098552
PSMB3	NM_002795	proteasome (prosome, macropain) subunit, beta type, 3	0.897874	0.00988422
ERAL1	AL562733	Era G-protein-like 1 (E. coli)	0.909126	0.00989846
ACTB	AA809056	actin, beta	0.79638	0.00990499
KIAA0195	NM_014738	KIAA0195	0.817021	0.00991766
CEP68	NM_015147	centrosomal protein 68kDa	0.954354	0.00994395
ZFAND2B	AA524690	zinc finger, AN1-type domain 2B	0.875681	0.0099556
NDUFV3	NM_021075	NADH dehydrogenase (ubiquinone) flavoprotein 3, 10kDa	0.744922	0.0100226
TM7SF2	AF096304	transmembrane 7 superfamily member 2	0.705117	0.0100492
ZBTB40	AI557467	zinc finger and BTB domain containing 40	0.913837	0.0100646
DHPS	U26266	deoxyhypusine synthase	0.902719	0.0100668
RBM15	NM_022768	RNA binding motif protein 15	0.918369	0.0100863
RGL1	AF186779	ral guanine nucleotide dissociation stimulator-like 1	0.93594	0.0100894
CUL9	AB014608	cullin 9	0.977118	0.0101358
MTMR8	NM_017677	myotubularin related protein 8	0.750076	0.0101447
NF2	NM_016418	neurofibromin 2 (merlin)	0.647418	0.0101689
WDR67	BC026969	WD repeat domain 67	0.876886	0.0101894
SAP30BP	NM_013260	SAP30 binding protein	0.962961	0.0102137
TNPO2	BG258639	transportin 2	0.923741	0.0102438
ALS2CR4	BG194770	amyotrophic lateral sclerosis 2 (juvenile) chromosome region, candidate 4	0.755496	0.0102699
NOL12	NM_024313	nucleolar protein 12	0.892251	0.0103032
LRRC48	NM_031294	leucine rich repeat containing 48	0.961284	0.0103044
PYCR1	NM_006907	pyrroline-5-carboxylate reductase 1	0.844808	0.0103088
LMF2	AI081535	lipase maturation factor 2	0.819446	0.010314
NSUN5B	AI768378	NOL1	0.952843	0.0103446
SNHG5	BG339050	small nucleolar RNA host gene 5 (non-protein coding)	0.929727	0.0103661
ITFG2	NM_018463	integrin alpha FG-GAP repeat containing 2	0.834673	0.0103735
SNX22	BC014660	sorting nexin 22	0.766057	0.0104152
CHAF1A	BF000239	chromatin assembly factor 1, subunit A (p150)	0.943816	0.0104247
KIAA0746	AA872583	KIAA0746 protein	0.82833	0.0104405
PSMC3	AL545523	proteasome (prosome, macropain) 26S subunit, ATPase, 3	0.913578	0.0104508
TBXAS1	NM_030984	thromboxane A synthase 1 (platelet)	0.925572	0.010455
KLHL34	AA988016	Kelch-like 34 (Drosophila) (KLHL34), mRNA	0.836625	0.0104899
CYB561	AL514271	cytochrome b-561	0.752154	0.0105107
NAT2	NM_000015	N-acetyltransferase 2 (arylamine N-acetyltransferase)	0.757272	0.0105188
PDE4D	BC008390	phosphodiesterase 4D, cAMP-specific (phosphodiesterase E3 dunce homolog, Drosophila)	0.780599	0.0105291
GLS	AF097493	glutaminase	0.681788	0.0106028
BID	AA706658	BH3 interacting domain death agonist	0.87069	0.0106064
ODZ3	NM_018104	odz, odd Oz	0.653646	0.0106178
GGT1	NM_013430	gamma-glutamyltransferase 1	0.781191	0.0106421
TTC39A	AK000220	tetratricopeptide repeat domain 39A	0.803037	0.0106678
NOL6	BE780892	nucleolar protein family 6 (RNA-associated)	0.88773	0.0106742
EMP2	NM_001424	epithelial membrane protein 2	0.722141	0.0106951
RPL37A	AU155515	ribosomal protein L37a	0.872075	0.0107288
WDR79	NM_018081	WD repeat domain 79	0.820337	0.0107357
CUX1	NM_001913	cut-like homeobox 1	0.935619	0.0107575
TMEM199	BG110004	transmembrane protein 199	0.944093	0.010759
EPR1	BQ021146	effector cell peptidase receptor 1 (non-protein coding)	0.882046	0.010786
PTGR1	BE566894	prostaglandin reductase 1	0.687639	0.0107961
STK36	AK022692	serine	0.938525	0.0108116
ERBB2	AF177761	v-erb-b2 erythroblastic leukemia viral oncogene homolog 2, neuro	0.946068	0.0108135
SAFB2	NM_014649	scaffold attachment factor B2	0.952336	0.0108219
ABHD14B	AL520200	abhydrolase domain containing 14B	0.836439	0.010858
SCAP	D83782	SREBF chaperone	0.778165	0.0108641
CA11	AB018195	carbonic anhydrase XI	0.888595	0.010872
MB	NM_005368	myoglobin	0.736221	0.0108777
ZNF287	NM_020653	zinc finger protein 287	0.940918	0.0108885
KIAA1602	AI784016	KIAA1602	0.853191	0.0108913
ATL3	AA775408	atlastin GTPase 3	0.720295	0.0108972
C12orf50	AW340321	chromosome 12 open reading frame 50	0.795082	0.0109719
WBSCR16	NM_030798	Williams-Beuren syndrome chromosome region 16	0.973972	0.0109719
LOC145783	BF111029	hypothetical LOC145783	0.583083	0.0109983
TSPYL1	AL136629	TSPY-like 1	0.913578	0.0110201
C10orf116	NM_006829	chromosome 10 open reading frame 116	0.852897	0.0110353
FMO5	BC020872	flavin containing monooxygenase 5	0.728586	0.0110529
C16orf58	NM_022744	chromosome 16 open reading frame 58	0.817709	0.0110872
PRELID1	AF112203	PRELI domain containing 1	0.882755	0.0111571
REG4	AI739241	regenerating islet-derived family, member 4	0.715711	0.0111642
ACD	NM_022914	adrenocortical dysplasia homolog (mouse)	0.859807	0.0111695
TOR2A	AA873275	torsin family 2, member A	0.757887	0.0111698
APOA1BP	BE871169	apolipoprotein A-I binding protein	0.740873	0.0111741
D4S234E	NM_014392	DNA segment on chromosome 4 (unique) 234 expressed sequence	0.968555	0.0111988
METTL7A	NM_014033	methyltransferase like 7A	0.611426	0.0112172
KIAA1875	AL137446	KIAA1875	0.959215	0.0112201
ASB13	NM_024701	ankyrin repeat and SOCS box-containing 13	0.845357	0.0112226
C6orf129	BE794699	chromosome 6 open reading frame 129	0.750346	0.0112315
CD72	AF283777	CD72 molecule	0.895659	0.0112513
AK3L1	AK026966	adenylate kinase 3-like 1	0.462475	0.011252
TNFRSF12A	NM_016639	tumor necrosis factor receptor superfamily, member 12A	0.826768	0.011325
NPC2	NM_006432	Niemann-Pick disease, type C2	0.869693	0.0113315
UHMK1	NM_144624	U2AF homology motif (UHM) kinase 1	0.818753	0.0113638
FCN1	NM_002003	ficolin (collagen	0.757292	0.0113666
LOC57228	BC003379	small trans-membrane and glycosylated protein	0.80136	0.0113816
XPNPEP3	BC001208	X-prolyl aminopeptidase (aminopeptidase P) 3, putative	0.609671	0.011387
FLJ36116	AK093435	hypothetical locus LOC388666	0.953755	0.0113933
LOC650686	AL157436	similar to nuclear RNA export factor 2	0.819113	0.0114261
PLEKHA3	BE550332	pleckstrin homology domain containing, family A (phosphoinositide binding specific) member 3	0.836672	0.0114409
PIM2	NM_006875	pim-2 oncogene	0.831863	0.0115453
SLC25A6	AA916851	solute carrier family 25 (mitochondrial carrier; adenine nucleotide translocator), member 6	0.72292	0.0115551
MED14	BE567032	mediator complex subunit 14	0.869062	0.0115792
SLC44A2	AI264216	solute carrier family 44, member 2	0.934352	0.0115879
C21orf121	AI138282	chromosome 21 open reading frame 121	0.602899	0.011612
PPOX	NM_000309	protoporphyrinogen oxidase	0.741684	0.0116129
CALM1	N25325	calmodulin 1 (phosphorylase kinase, delta)	0.844616	0.0116148
L3MBTL4	BC039316	l(3)mbt-like 4 (Drosophila)	0.869099	0.0116176
HOXD1	AI168371	homeobox D1	0.941403	0.0116326
SLC35B2	BG163267	solute carrier family 35, member B2	0.784039	0.0116346
TREX2	AF319573	three prime repair exonuclease 2	0.885782	0.0116407
RPL18	NM_000979	ribosomal protein L18	0.79686	0.0116707
C12orf10	NM_021640	chromosome 12 open reading frame 10	0.842745	0.0117501
SNX30	AI674625	sorting nexin family member 30	0.835602	0.0117507
CAPG	NM_001747	capping protein (actin filament), gelsolin-like	0.909001	0.0117708
ZNF44	AL137602	zinc finger protein 44	0.937836	0.0117839
ZHX3	AW292783	zinc fingers and homeoboxes 3	0.967047	0.0118081
SLC6A12	U27699	solute carrier family 6 (neurotransmitter transporter, betaine	0.838826	0.0118144
SLC12A6	NM_005135	solute carrier family 12 (potassium	0.794696	0.0118289
FBRS	NM_022452	fibrosin	0.884342	0.0118358
FAM127B	NM_015582	family with sequence similarity 127, member B	0.887542	0.0118432
LARP2	BC030516	La ribonucleoprotein domain family, member 2	0.731596	0.0118563
TP53BP1	BU508386	tumor protein p53 binding protein 1	0.754636	0.0118711
C14orf1	NM_007176	chromosome 14 open reading frame 1	0.855482	0.0118892
C6orf165	AI798983	chromosome 6 open reading frame 165	0.771008	0.0118965
LOC285550	BF108695	hypothetical protein LOC285550	0.759779	0.0119045
ABCB4	NM_000443	ATP-binding cassette, sub-family B (MDR	0.971134	0.0119196
JAK1	BC035370	Homo sapiens, clone IMAGE:5168577, mRNA	0.685601	0.0119318
ZER1	AI991574	zer-1 homolog (C. elegans)	0.95874	0.0119424
LYNX1	BG701653	Ly6	0.565328	0.0119684
KLHDC3	BC001793	kelch domain containing 3	0.681367	0.0119921
HDAC3	AF059650	histone deacetylase 3	0.958305	0.0120028
TEX261	AV759552	testis expressed 261	0.654046	0.0120848
ADIPOR1	NM_015999	adiponectin receptor 1	0.880519	0.0120872
CLCN3	NM_001829	chloride channel 3	0.823687	0.0120904
IDH2	U52144	isocitrate dehydrogenase 2 (NADP+), mitochondrial	0.712953	0.0120934
FAM138A	BM686056	family with sequence similarity 138, member A	0.954503	0.0121233
RTEL1	NM_003823	regulator of telomere elongation helicase 1	0.82199	0.0121343
IGFBP5	NM_000599	insulin-like growth factor binding protein 5	0.628088	0.0121617
AIF1L	AA205873	allograft inflammatory factor 1-like	0.635058	0.0121627
DDX11	U33833	DEAD	0.920505	0.0121695
ARAF	NM_001654	v-raf murine sarcoma 3611 viral oncogene homolog	0.912138	0.0121986
SHMT1	Y14488	serine hydroxymethyltransferase 1 (soluble)	0.76927	0.0121993
COPS7A	AF193844	COP9 constitutive photomorphogenic homolog subunit 7A (Arabidopsis)	0.846293	0.0122454
C7orf47	BF000655	chromosome 7 open reading frame 47	0.92031	0.0122732
KCNMB4	AF160967	potassium large conductance calcium-activated channel, subfamily M, beta member 4	0.721852	0.0122793
PP14571	AF070536	similar to hCG1777210	0.802026	0.0123124
RS1	NM_000330	retinoschisin 1	0.902931	0.0123126
PIK3IP1	BE042976	phosphoinositide-3-kinase interacting protein 1	0.795441	0.0123136
C9orf80	AF161411	chromosome 9 open reading frame 80	0.877152	0.012317
GPAA1	NM_003801	glycosylphosphatidylinositol anchor attachment protein 1 homolog (yeast)	0.678764	0.0123441
CCDC34	NM_080654	coiled-coil domain containing 34	0.914969	0.0123564
TPBG	NM_006670	trophoblast glycoprotein	0.803504	0.0123605
PRSS33	NM_152891	protease, serine, 33	0.946622	0.0123639
BACE2	AF178532	beta-site APP-cleaving enzyme 2	0.99337	0.0123787
MRPL43	AB049656	mitochondrial ribosomal protein L43	0.812586	0.012411
AKR1A1	NM_006066	aldo-keto reductase family 1, member A1 (aldehyde reductase)	0.667752	0.0124388
INO80B	U79457	INO80 complex subunit B	0.659323	0.0124606
G6PC3	AL583123	glucose 6 phosphatase, catalytic, 3	0.829835	0.0124668
MBTPS2	BC036465	membrane-bound transcription factor peptidase, site 2	0.802778	0.0124707
C1QTNF6	AF329842	C1q and tumor necrosis factor related protein 6	0.777613	0.0125052
SELT	NM_016275	selenoprotein T	0.830429	0.0125163
MON1B	AK023374	MON1 homolog B (yeast)	0.875896	0.0125221
GUCA1C	AF110003	guanylate cyclase activator 1C	0.78798	0.0125254
SORBS2	AF396457	sorbin and SH3 domain containing 2	0.56063	0.0125337
FAM160A2	AL136723	family with sequence similarity 160, member A2	0.946605	0.0125484
RFX3	H97074	regulatory factor X, 3 (influences HLA class II expression)	0.766279	0.012555
ARF3	NM_001659	ADP-ribosylation factor 3	0.930235	0.0125704
PLEKHH1	AB033026	pleckstrin homology domain containing, family H (with MyTH4 domain) member 1	0.912944	0.0126172
STRN	BC036416	striatin, calmodulin binding protein	0.744359	0.0126253
DKFZp761D1918	AL831916	hypothetical protein DKFZp761D1918	0.853782	0.0126256
POLQ	NM_014125	polymerase (DNA directed), theta	0.873812	0.0126291
PRKAR2A	BC002763	protein kinase, cAMP-dependent, regulatory, type II, alpha	0.742243	0.0126333
LSS	D63807	lanosterol synthase (2,3-oxidosqualene-lanosterol cyclase)	0.829682	0.0126477
TUBA1A	AF141347	tubulin, alpha 1a	0.927915	0.0126606
LOC728613	AI692169	programmed cell death 6 pseudogene	0.93146	0.012675
SASH1	AU144882	SAM and SH3 domain containing 1	0.738382	0.0126768
MYO3B	NM_138995	myosin IIIB	0.913694	0.0127256
OSBPL10	AK024945	oxysterol binding protein-like 10	0.899194	0.0127256
NT5DC2	NM_022908	5'-nucleotidase domain containing 2	0.515048	0.0128166
PEF1	NM_012392	penta-EF-hand domain containing 1	0.905621	0.0128272
NAT13	AU149868	N-acetyltransferase 13 (GCN5-related)	0.854954	0.0128311
RPS6KB2	NM_003952	ribosomal protein S6 kinase, 70kDa, polypeptide 2	0.786529	0.0128529
TEAD1	AI590088	TEA domain family member 1 (SV40 transcriptional enhancer factor)	0.775062	0.0128781
COX5A	AF042162	cytochrome c oxidase subunit Va	0.718095	0.0128974
ATAD3B	BC002542	ATPase family, AAA domain containing 3B	0.950312	0.0129031
C2orf24	NM_015680	chromosome 2 open reading frame 24	0.942763	0.0129902
FIGN	AK025747	fidgetin	0.936996	0.0130047
SLC12A4	AI817690	solute carrier family 12 (potassium	0.955599	0.0130402
FANCF	AF181995	Fanconi anemia, complementation group F	0.920753	0.01308
ARL2	NM_001667	ADP-ribosylation factor-like 2	0.812459	0.0131
MEN1	NM_000244	multiple endocrine neoplasia I	0.966337	0.0131085
TBR1	NM_006593	T-box, brain, 1	0.892346	0.0131109
LOC147804	AC004079	tropomyosin 3 pseudogene	0.74302	0.013145
PHKB	AW873632	phosphorylase kinase, beta	0.995765	0.0131458
LASS6	BG257755	LAG1 homolog, ceramide synthase 6	0.874234	0.0131619
PFN4	AW274294	profilin family, member 4	0.777278	0.0131894
C19orf50	BC006479	chromosome 19 open reading frame 50	0.805837	0.0131982
NUDT16	BE780834	nudix (nucleoside diphosphate linked moiety X)-type motif 16	0.817237	0.0132082
PLEKHA1	NM_021622	pleckstrin homology domain containing, family A (phosphoinositide binding specific) member 1	0.625416	0.0132099
CD276	NM_025240	CD276 molecule	0.909133	0.0132229
PLSCR3	NM_020360	phospholipid scramblase 3	0.710345	0.0132269
DHRS13	AI076793	dehydrogenase	0.857966	0.0132539
ARMC2	AL136754	armadillo repeat containing 2	0.947039	0.0132552
LOC729680	AI669535	hypothetical protein LOC729680	0.708713	0.0132552
IRF4	NM_002460	interferon regulatory factor 4	0.935117	0.0132631
FASTK	NM_006712	Fas-activated serine	0.771972	0.0132706
DCAKD	NM_024819	dephospho-CoA kinase domain containing	0.757903	0.0132854
PERP	NM_022121	PERP, TP53 apoptosis effector	0.754562	0.0132857
ZNF836	BE791720	zinc finger protein 836	0.86297	0.0133168
CST3	NM_000099	cystatin C	0.774874	0.0133655
MDGA1	BE730067	MAM domain containing glycosylphosphatidylinositol anchor 1	0.843215	0.0133665
IRX5	U90304	iroquois homeobox 5	0.917288	0.013408
TCEAL3	AA847654	transcription elongation factor A (SII)-like 3	0.89451	0.0134409
FAM168B	BF056651	family with sequence similarity 168, member B	0.752173	0.0134502
LOC728723	AK055144	hypothetical LOC728723	0.825285	0.0134523
TMTC4	D80480	transmembrane and tetratricopeptide repeat containing 4	0.803592	0.0134552
GSTM4	M99422	glutathione S-transferase mu 4	0.710692	0.0134615
ZNF826	BC016785	zinc finger protein 826	0.685858	0.0134769
SPTLC2	BC005123	serine palmitoyltransferase, long chain base subunit 2	0.908536	0.0134949
EFCAB1	NM_024593	EF-hand calcium binding domain 1	0.93537	0.013496
RPS6KA1	NM_002953	ribosomal protein S6 kinase, 90kDa, polypeptide 1	0.850415	0.013543
GRLF1	AI670100	glucocorticoid receptor DNA binding factor 1	0.946845	0.0135433
OAZ2	NM_002537	ornithine decarboxylase antizyme 2	0.729692	0.0135706
PSG3	R32065	pregnancy specific beta-1-glycoprotein 3	0.718126	0.0135831
HIST3H3	NM_003493	histone cluster 3, H3	0.769052	0.0136221
PDE1A	BQ894022	phosphodiesterase 1A, calmodulin-dependent	0.63135	0.0136409
LOC550643	BE621082	hypothetical LOC550643	0.65625	0.0136681
ATPBD4	AL833427	ATP binding domain 4	0.828324	0.0136736
DEPDC1B	AK001166	DEP domain containing 1B	0.75939	0.0136896
MGAT5B	BC041577	mannosyl (alpha-1,6-)-glycoprotein beta-1,6-N-acetyl-glucosaminyltransferase, isozyme B	0.840151	0.0137025
ANKLE2	AK025933	ankyrin repeat and LEM domain containing 2	0.925594	0.0137083
NDRG2	W74452	NDRG family member 2	0.691833	0.0137139
SNRPN	AF319523	small nuclear ribonucleoprotein polypeptide N	0.628627	0.013714
NSFL1C	AK023585	NSFL1 (p97) cofactor (p47)	0.966452	0.0137151
HN1	AF060925	hematological and neurological expressed 1	0.94504	0.0137207
NAG18	AF210651	NAG18 mRNA	0.867119	0.0137956
SEMA3F	U38276	sema domain, immunoglobulin domain (Ig), short basic domain, secreted, (semaphorin) 3F	0.937152	0.0138035
TPI1	NM_000365	triosephosphate isomerase 1	0.916925	0.0138145
ACOT8	NM_005469	acyl-CoA thioesterase 8	0.758608	0.0138226
ALG14	AI652839	Asparagine-linked glycosylation 14 homolog (S. cerevisiae) (ALG14), mRNA	0.614094	0.0138309
TMEM108	AB051477	transmembrane protein 108	0.881314	0.0138405
METT5D1	AL713720	methyltransferase 5 domain containing 1	0.949107	0.0138539
FAM117B	NM_173511	family with sequence similarity 117, member B	0.886238	0.0138619
PRAF2	NM_007213	PRA1 domain family, member 2	0.804952	0.0138762
KCNK6	AF134149	potassium channel, subfamily K, member 6	0.79781	0.0139279
PDLIM5	AK027217	PDZ and LIM domain 5	0.874008	0.0139293
DHCR7	AW150953	7-dehydrocholesterol reductase	0.826277	0.0139667
SLC9A3R1	NM_004252	solute carrier family 9 (sodium	0.843877	0.0139677
MYO19	AA994178	myosin XIX	0.939514	0.0139967
MPPED2	BE645386	metallophosphoesterase domain containing 2	0.751708	0.0140515
ALG12	NM_024105	asparagine-linked glycosylation 12, alpha-1,6-mannosyltransferase homolog (S. cerevisiae)	0.928531	0.0140517
LOC388474	AJ224080	similar to ribosomal protein L7a	0.815699	0.0140598
C14orf53	AI650524	chromosome 14 open reading frame 53	0.777228	0.0141378
FOXRED1	AL136923	FAD-dependent oxidoreductase domain containing 1	0.716748	0.0141634
SPTBN2	NM_006946	spectrin, beta, non-erythrocytic 2	0.841312	0.014173
GJA1	NM_000165	gap junction protein, alpha 1, 43kDa	0.6997	0.0141801
LEPROT	NM_017526	leptin receptor overlapping transcript	0.799331	0.0142047
SUFU	AF144231	suppressor of fused homolog (Drosophila)	0.954738	0.0142198
LOC644135	BC038719	hypothetical LOC644135	0.881936	0.0142225
FAM89B	BF974389	family with sequence similarity 89, member B	0.715561	0.0142324
CACNA1A	BC042451	Neuronal calcium channel alpha 1A subunit isoform A-1	0.414949	0.0142432
FGF18	AB007422	fibroblast growth factor 18	0.683962	0.0142432
ARL4D	NM_001661	ADP-ribosylation factor-like 4D	0.795048	0.0142493
PYGB	NM_002862	phosphorylase, glycogen; brain	0.947671	0.0142516
P2RY2	NM_002564	purinergic receptor P2Y, G-protein coupled, 2	0.777906	0.014255
KIAA1161	AB032987	KIAA1161	0.556892	0.0142712
ARL1	NM_001177	ADP-ribosylation factor-like 1	0.843445	0.0142982
CAPN9	NM_006615	calpain 9	0.947174	0.0143128
TTLL5	NM_015072	tubulin tyrosine ligase-like family, member 5	0.869805	0.0143223
ALKBH6	AW105337	alkB, alkylation repair homolog 6 (E. coli)	0.65129	0.014328
RAD54L	NM_003579	RAD54-like (S. cerevisiae)	0.86259	0.0143373
MAN2B1	U68567	mannosidase, alpha, class 2B, member 1	0.644945	0.0144013
C14orf143	BC001787	chromosome 14 open reading frame 143	0.787516	0.0144234
LOC389043	AI653224	hypothetical gene supported by AK125982; BC042817	0.8	0.0144587
PEX10	NM_002617	peroxisomal biogenesis factor 10	0.877953	0.0144658
MUM1	AL360266	melanoma associated antigen (mutated) 1	0.937301	0.0144956
AVPI1	NM_021732	arginine vasopressin-induced 1	0.836367	0.0145449
NCRNA00116	AW182614	non-protein coding RNA 116	0.862665	0.014546
CLPP	NM_006012	ClpP caseinolytic peptidase, ATP-dependent, proteolytic subunit homolog (E. coli)	0.863909	0.0145793
GSS	L42531	glutathione synthetase	0.845177	0.0145842
G3BP2	NM_012297	GTPase activating protein (SH3 domain) binding protein 2	0.563001	0.0145907
PIGT	NM_015937	phosphatidylinositol glycan anchor biosynthesis, class T	0.792283	0.0146087
NDUFS8	NM_002496	NADH dehydrogenase (ubiquinone) Fe-S protein 8, 23kDa (NADH-coenzyme Q reductase)	0.767854	0.0146091
RPL13	BC004954	ribosomal protein L13	0.81417	0.0146194
CYP26B1	NM_019885	cytochrome P450, family 26, subfamily B, polypeptide 1	0.807812	0.0146205
SLC25A27	BC033091	solute carrier family 25, member 27	0.850474	0.0146416
ELP3	AI949204	elongation protein 3 homolog (S. cerevisiae)	0.63281	0.0146808
ABCB9	BC017348	ATP-binding cassette, sub-family B (MDR	0.819032	0.0146901
C11orf51	NM_014042	chromosome 11 open reading frame 51	0.744736	0.0147232
DAK	NM_015533	dihydroxyacetone kinase 2 homolog (S. cerevisiae)	0.771172	0.0147913
UBE3A	AA527499	ubiquitin protein ligase E3A	0.960289	0.0147982
PPP1CA	NM_002708	protein phosphatase 1, catalytic subunit, alpha isoform	0.838297	0.014813
NDUFS6	NM_004553	NADH dehydrogenase (ubiquinone) Fe-S protein 6, 13kDa (NADH-coenzyme Q reductase)	0.791549	0.0148158
EPOR	M34986	erythropoietin receptor	0.832524	0.0148696
LOC375295	AI569804	hypothetical gene supported by BC013438	0.702495	0.0148952
GAMT	NM_138924	guanidinoacetate N-methyltransferase	0.712268	0.0149011
DGKZ	NM_003646	diacylglycerol kinase, zeta 104kDa	0.83801	0.0149108
CHIC2	NM_012110	cysteine-rich hydrophobic domain 2	0.94517	0.0149171
MGMT	NM_002412	O-6-methylguanine-DNA methyltransferase	0.883728	0.0149305
ARPC1B	NM_005720	actin related protein 2	0.867429	0.0149333
TMEM19	NM_018279	transmembrane protein 19	0.597186	0.0149343
CSAD	NM_015989	cysteine sulfinic acid decarboxylase	0.85554	0.0149591
RBM10	AW409974	RNA binding motif protein 10	0.906556	0.0150096
AP2A1	AL136925	adaptor-related protein complex 2, alpha 1 subunit	0.910645	0.0150538
MRPS34	NM_023936	mitochondrial ribosomal protein S34	0.909872	0.0150683
ZADH2	BF591611	zinc binding alcohol dehydrogenase domain containing 2	0.752347	0.0151059
PARVG	AF237772	parvin, gamma	0.937503	0.0151077
OR12D3	NM_030876	olfactory receptor, family 12, subfamily D, member 3	0.840819	0.015135
DCXR	NM_016286	dicarbonyl	0.792094	0.015142
HAL	AV652386	Histidase	0.637931	0.0151462
LOC100131848	AK097099	FP2025	0.864534	0.0151462
LOC286002	BC037315	hypothetical protein LOC286002	0.825177	0.0151462
MDS2	NM_148895	myelodysplastic syndrome 2 translocation associated	0.883624	0.0151563
CTDSP2	NM_005730	CTD (carboxy-terminal domain, RNA polymerase II, polypeptide A) small phosphatase 2	0.937113	0.0151564
PRKAA2	NM_006252	protein kinase, AMP-activated, alpha 2 catalytic subunit	0.540912	0.0152596
YIF1A	NM_020470	Yip1 interacting factor homolog A (S. cerevisiae)	0.913129	0.0152988
CES2	BF033242	carboxylesterase 2 (intestine, liver)	0.9557	0.0153047
SLC25A1	U25147	solute carrier family 25 (mitochondrial carrier; citrate transporter), member 1	0.678287	0.0153213
ACTG1	NM_001614	actin, gamma 1	0.94719	0.0154401
WDR4	BC001074	WD repeat domain 4	0.916038	0.0154439
PRG2	NM_024888	plasticity-related gene 2	0.936812	0.0154446
RDH12	AI796235	retinol dehydrogenase 12 (all-trans	0.887369	0.0154466
UHRF1	AK025578	ubiquitin-like with PHD and ring finger domains 1	0.778789	0.0154834
ALKBH7	AI245026	alkB, alkylation repair homolog 7 (E. coli)	0.68878	0.0154979
VGLL1	BE542323	vestigial like 1 (Drosophila)	0.630544	0.0154994
SNX10	NM_013322	sorting nexin 10	0.651825	0.015512
OR7E47P	AW514038	olfactory receptor, family 7, subfamily E, member 47 pseudogene	0.703939	0.0155201
UQCRC1	NM_003365	ubiquinol-cytochrome c reductase core protein I	0.782321	0.0155531
ANXA9	AF230929	annexin A9	0.68326	0.0155671
ARL3	NM_004311	ADP-ribosylation factor-like 3	0.754421	0.0155859
TMEM39B	NM_018056	transmembrane protein 39B	0.826481	0.0155908
SLC24A3	NM_020689	solute carrier family 24 (sodium	0.860535	0.0155987
TMEM144	BC035811	transmembrane protein 144	0.815718	0.0156535
LMNB1	NM_005573	lamin B1	0.790088	0.0156591
RFX2	AK024288	regulatory factor X, 2 (influences HLA class II expression)	0.93995	0.0157041
PNKD	AA074597	paroxysmal nonkinesigenic dyskinesia	0.558959	0.0157174
POLR1B	CA442932	polymerase (RNA) I polypeptide B, 128kDa	0.929614	0.015728
RPL13A	BC000514	ribosomal protein L13a	0.857145	0.0157331
ARPC1A	NM_006409	actin related protein 2	0.841565	0.0157529
AP1M2	NM_005498	adaptor-related protein complex 1, mu 2 subunit	0.809015	0.0157618
ATP13A3	BF218804	ATPase type 13A3	0.919779	0.0157654
FKBP9	AL050187	FK506 binding protein 9, 63 kDa	0.843084	0.0158082
FUBP1	AA156865	far upstream element (FUSE) binding protein 1	0.837184	0.0158292
EHD1	AY007161	EH-domain containing 1	0.76316	0.0158303
EGO	AW970881	eosinophil granule ontogeny	0.750754	0.0158358
WBSCR27	NM_152559	Williams Beuren syndrome chromosome region 27	0.757089	0.0158417
CNIH4	T87074	cornichon homolog 4 (Drosophila)	0.790012	0.015847
SCAND2	AK022844	SCAN domain containing 2 pseudogene	0.873544	0.0158846
SLC39A8	AB040120	solute carrier family 39 (zinc transporter), member 8	0.620511	0.0159104
MGC3207	AK026666	translation initiation factor eIF-2B subunit alpha	0.866256	0.0159328
FAM110A	AL118502	family with sequence similarity 110, member A	0.887253	0.0159502
CLDN3	NM_001306	claudin 3	0.823835	0.0159559
GNPTG	AF302786	N-acetylglucosamine-1-phosphate transferase, gamma subunit	0.805275	0.0159762
HDAC6	NM_006044	histone deacetylase 6	0.905946	0.0160113
SHISA4	AL522395	shisa homolog 4 (Xenopus laevis)	0.827971	0.0160229
C1orf198	BC004870	chromosome 1 open reading frame 198	0.778012	0.0160306
RNF10	NM_014868	ring finger protein 10	0.835738	0.0160357
C19orf46	AA827649	chromosome 19 open reading frame 46	0.767349	0.0160626
KIAA1908	BC036405	KIAA1908 protein	0.908817	0.0160774
LOC100130648	X79200	similar to Protein SSX2 (Synovial sarcoma, X breakpoint 2) (Cancer	0.889751	0.0160845
ST6GALNAC6	AK023900	ST6 (alpha-N-acetyl-neuraminyl-2,3-beta-galactosyl-1,3)-N-acetylgalactosaminide alpha-2,6-sialyltransferase 6	0.863668	0.0161014
ZNF282	AW130128	zinc finger protein 282	0.99206	0.0161121
LOC100128731	BF211019	dolichyl-diphosphooligosaccharide--protein glycosyltransferase subunit 4	0.70693	0.0161191
TSC2	AC005600	tuberous sclerosis 2	0.893566	0.0161339
CALCOCO2	AF085965	calcium binding and coiled-coil domain 2	0.750672	0.0161503
PRICKLE4	AF216754	prickle homolog 4 (Drosophila)	0.772291	0.0161578
PREX2	NM_025170	phosphatidylinositol-3,4,5-trisphosphate-dependent Rac exchange factor 2	0.889529	0.016185
SORT1	BE622952	sortilin 1	0.475313	0.0161874
BLVRB	NM_000713	biliverdin reductase B (flavin reductase (NADPH))	0.688071	0.0161918
ATP5I	BC003679	ATP synthase, H+ transporting, mitochondrial F0 complex, subunit E	0.895551	0.0162436
COPA	AI621079	coatomer protein complex, subunit alpha	0.844252	0.0162515
HIST1H2BN	NM_003520	histone cluster 1, H2bn	0.853103	0.0162525
KRT18P50	AL034348	keratin 18 pseudogene 50	0.875133	0.0162677
HIST1H3J	AL522145	Histone cluster 1, H3j (HIST1H3J), mRNA	0.586017	0.0162998
HS3ST1	NM_005114	heparan sulfate (glucosamine) 3-O-sulfotransferase 1	0.824009	0.0163145
ELOVL1	NM_016031	elongation of very long chain fatty acids (FEN1	0.741303	0.0163589
CERK	NM_022766	ceramide kinase	0.804625	0.0163626
IDH3B	AF023266	isocitrate dehydrogenase 3 (NAD+) beta	0.967082	0.0163808
CNPY2	BC001027	canopy 2 homolog (zebrafish)	0.905683	0.0163886
PITRM1	BF338748	pitrilysin metallopeptidase 1	0.910517	0.0163932
ILVBL	BC000109	ilvB (bacterial acetolactate synthase)-like	0.730765	0.0164087
DSC2	AU154691	desmocollin 2	0.72037	0.0164279
NUDCD3	NM_015332	NudC domain containing 3	0.993417	0.0164405
DERL2	NM_016041	Der1-like domain family, member 2	0.834255	0.0164525
HINT2	AF356515	histidine triad nucleotide binding protein 2	0.869639	0.0164708
TNFRSF1B	NM_001066	tumor necrosis factor receptor superfamily, member 1B	0.928864	0.0164837
EEF1E1	NM_004280	eukaryotic translation elongation factor 1 epsilon 1	0.892309	0.0164868
HDLBP	AA515560	high density lipoprotein binding protein	0.580145	0.0164868
SCAND1	NM_016558	SCAN domain containing 1	0.736949	0.0165076
HIGD1A	NM_014056	HIG1 domain family, member 1A	0.842546	0.0165162
GCC1	N75454	Full length insert cDNA clone ZA83B04	0.767554	0.0165637
CTSB	NM_001908	cathepsin B	0.981705	0.0165643
LOC284379	BC016813	solute carrier family 7 (cationic amino acid transporter, y+ system), member 3 pseudogene	0.845794	0.0165645
DNAH6	AJ132086	dynein, axonemal, heavy chain 6	0.807643	0.0166235
LOC654433	AY007128	CDNA clone IMAGE:4826696	0.939852	0.016651
GAS2L1	BC001782	growth arrest-specific 2 like 1	0.88212	0.0166556
POLR2L	AA772747	polymerase (RNA) II (DNA directed) polypeptide L, 7.6kDa	0.646432	0.01671
NARFL	NM_022493	nuclear prelamin A recognition factor-like	0.878223	0.0167205
DNAJC9	AW205929	DnaJ (Hsp40) homolog, subfamily C, member 9	0.724638	0.0167377
LOC201617	BE468097	hypothetical protein LOC201617	0.766871	0.0167377
ETNK2	NM_018208	ethanolamine kinase 2	0.584324	0.0167488
PBX1	AL049381	pre-B-cell leukemia homeobox 1	0.84545	0.0167489
MAD2L2	AF080398	MAD2 mitotic arrest deficient-like 2 (yeast)	0.816868	0.016794
ZNF471	AF352026	zinc finger protein 471	0.724506	0.0168283
KRT18P44	AL031903	keratin 18 pseudogene 44	0.932281	0.01686
SNX21	AI935964	sorting nexin family member 21	0.791088	0.0168659
CISD3	BG171264	CDGSH iron sulfur domain 3	0.647674	0.0168855
C14orf83	BF059021	chromosome 14 open reading frame 83	0.607184	0.0168856
RAD23A	BF572938	RAD23 homolog A (S. cerevisiae)	0.870873	0.0169126
PLCD3	AI521584	phospholipase C, delta 3	0.854857	0.0169557
SSX4	NM_005636	synovial sarcoma, X breakpoint 4	0.982651	0.0169605
GPX3	NM_002084	glutathione peroxidase 3 (plasma)	0.791221	0.0169619
FANCG	NM_004629	Fanconi anemia, complementation group G	0.688945	0.0169719
FUT6	AI953599	Homo sapiens, clone IMAGE:4557161, mRNA	0.888541	0.0169723
EEF1D	NM_001960	eukaryotic translation elongation factor 1 delta (guanine nucleotide exchange protein)	0.90762	0.0169822
TFF3	NM_003226	trefoil factor 3 (intestinal)	0.601854	0.016988
LTA	NM_000595	lymphotoxin alpha (TNF superfamily, member 1)	0.933756	0.0170201
ATP5G2	NM_005176	ATP synthase, H+ transporting, mitochondrial F0 complex, subunit C2 (subunit 9)	0.744316	0.017046
PHYHIPL	AI829726	phytanoyl-CoA 2-hydroxylase interacting protein-like	0.662462	0.0170478
CCT3	NM_005998	chaperonin containing TCP1, subunit 3 (gamma)	0.943668	0.0170628
NCAPH2	NM_014551	non-SMC condensin II complex, subunit H2	0.811292	0.0170758
KBTBD4	NM_018095	kelch repeat and BTB (POZ) domain containing 4	0.957929	0.0170898
KBTBD4	NM_018095	kelch repeat and BTB (POZ) domain containing 4	0.957929	0.0170898
PPT2	AF020543	palmitoyl-protein thioesterase 2	0.837631	0.0170951
LOC401351	AI693542	hypothetical gene supported by BC040831	0.708464	0.017097
SPSB3	AL571723	splA	0.83756	0.0171208
ATG9B	NM_173681	ATG9 autophagy related 9 homolog B (S. cerevisiae)	0.951258	0.017158
LOC100134119	AI693606	similar to hCG2018924	0.615812	0.0171704
NLRX1	NM_170722	NLR family member X1	0.87479	0.0171743
AP2M1	NM_004068	adaptor-related protein complex 2, mu 1 subunit	0.88071	0.0172137
SPANXA1	AF098306	sperm protein associated with the nucleus, X-linked, family member A1	0.825272	0.0172511
PSRC1	BC001425	proline	0.81443	0.0172755
ZNF430	NM_025189	zinc finger protein 430	0.894197	0.017277
PLA2G6	NM_003560	phospholipase A2, group VI (cytosolic, calcium-independent)	0.947533	0.0172987
NTN1	NM_004822	netrin 1	0.836386	0.0173452
ATP5E	NM_006886	ATP synthase, H+ transporting, mitochondrial F1 complex, epsilon subunit	0.660115	0.0173749
RNPEPL1	NM_018226	arginyl aminopeptidase (aminopeptidase B)-like 1	0.733626	0.0173842
INADL	AW006782	InaD-like (Drosophila)	0.889045	0.0173991
FAM36A	AA831192	family with sequence similarity 36, member A	0.815005	0.0174055
PCYT1B	NM_004845	phosphate cytidylyltransferase 1, choline, beta	0.880196	0.0174298
PTGDS	M61900	prostaglandin D2 synthase 21kDa (brain)	0.894525	0.0174333
HIST1H1C	BC002649	histone cluster 1, H1c	0.722524	0.0174673
MGC16385	BC005105	hypothetical protein MGC16385	0.954756	0.0174679
MRPL11	NM_016050	mitochondrial ribosomal protein L11	0.863894	0.0174803
GSC	AY177407	goosecoid homeobox	0.898002	0.0174995
ZNF663	NM_173643	zinc finger protein 663	0.874107	0.0175186
SGK196	NM_032237	protein kinase-like protein SgK196	0.850692	0.0175248
FOLR1	NM_016725	folate receptor 1 (adult)	0.572731	0.0175448
CFHR3	BC020680	CDNA FLJ60136 complete cds, moderately similar to Complement factor H-related protein 3 precursor	0.668067	0.0175497
STARD10	D60944	StAR-related lipid transfer (START) domain containing 10	0.869013	0.0175554
CDK6	NM_001259	cyclin-dependent kinase 6	0.894895	0.0175602
FAM172A	AI927701	family with sequence similarity 172, member A	0.586822	0.0176907
C17orf37	BC006006	chromosome 17 open reading frame 37	0.847751	0.0177101
FAU	NM_001997	Finkel-Biskis-Reilly murine sarcoma virus (FBR-MuSV) ubiquitously expressed	0.849769	0.0177244
NCRNA00164	AL041783	non-protein coding RNA 164	0.813301	0.0177414
COX7C	AF042165	cytochrome c oxidase subunit VIIc	0.904347	0.017751
SNX17	NM_014748	sorting nexin 17	0.820139	0.0177736
DLL4	AB036931	delta-like 4 (Drosophila)	0.890555	0.0177845
CPT1A	BF001714	carnitine palmitoyltransferase 1A (liver)	0.919197	0.017798
FBXL20	AA649201	F-box and leucine-rich repeat protein 20	0.851353	0.0178362
VAMP7	NM_005638	vesicle-associated membrane protein 7	0.848647	0.0178647
SLC39A13	NM_152264	solute carrier family 39 (zinc transporter), member 13	0.952448	0.0179136
PCDH1	AA481656	protocadherin 1	0.913353	0.0179194
HIBADH	AK025558	3-hydroxyisobutyrate dehydrogenase	0.798676	0.0179615
TSPAN3	NM_005724	tetraspanin 3	0.937483	0.0179682
ARHGAP29	AK092668	PTPL1-associated RhoGAP	0.812721	0.0179983
LAMB2	X79683	laminin, beta 2 (laminin S)	0.895134	0.0180082
WNT9A	NM_003395	wingless-type MMTV integration site family, member 9A	0.915799	0.0180153
PELO	NM_014100	pelota homolog (Drosophila)	0.683762	0.0180345
NDUFA4	NM_002489	NADH dehydrogenase (ubiquinone) 1 alpha subcomplex, 4, 9kDa	0.788556	0.0180706
FAM45A	AK025354	family with sequence similarity 45, member A	0.912189	0.0181029
MAGED1	AF217963	melanoma antigen family D, 1	0.785115	0.0181694
SLC25A5	NM_001152	solute carrier family 25 (mitochondrial carrier; adenine nucleotide translocator), member 5	0.874596	0.0181782
AGBL5	AK023398	ATP	0.6649	0.0181867
ACOT1	NM_006821	acyl-CoA thioesterase 1	0.803338	0.018247
GPATCH3	NM_022078	G patch domain containing 3	0.973053	0.0182489
NUDT14	W24623	nudix (nucleoside diphosphate linked moiety X)-type motif 14	0.868451	0.0182514
SFI1	AB011114	Sfi1 homolog, spindle assembly associated (yeast)	0.93463	0.0182798
C12orf52	AI937468	chromosome 12 open reading frame 52	0.952367	0.0182924
HEY2	AF232238	hairy	0.429105	0.0183016
PARD3B	BF434006	par-3 partitioning defective 3 homolog B (C. elegans)	0.756333	0.018323
RPS15	NM_001018	ribosomal protein S15	0.915099	0.0183941
C21orf70	BF981413	chromosome 21 open reading frame 70	0.964388	0.0183955
ANTXR1	AL110155	Clone IMAGE 286356	0.842684	0.0184035
RAB1B	NM_030981	RAB1B, member RAS oncogene family	0.836421	0.018423
ACACB	R99037	acetyl-Coenzyme A carboxylase beta	0.880977	0.0184472
LOC100129022	BF511170	PREDICTED: Homo sapiens hypothetical protein LOC100129022 (LOC100129022), mRNA	0.7668	0.0184514
PIGX	NM_017861	phosphatidylinositol glycan anchor biosynthesis, class X	0.968475	0.0184523
ATP6V1B2	NM_001693	ATPase, H+ transporting, lysosomal 56	0.787617	0.0184739
FLYWCH2	AL542248	FLYWCH family member 2	0.851975	0.0185009
STUB1	AI476536	STIP1 homology and U-box containing protein 1	0.635654	0.0185012
DERL3	BF433930	MRNA full length insert cDNA clone EUROIMAGE 1013048	0.560235	0.0185576
ATF4	NM_001675	activating transcription factor 4 (tax-responsive enhancer element B67)	0.930997	0.0185624
TUFM	NM_003321	Tu translation elongation factor, mitochondrial	0.842723	0.0185698
GPSN2	NM_004868	glycoprotein, synaptic 2	0.774573	0.0185944
PIGM	AB028127	phosphatidylinositol glycan anchor biosynthesis, class M	0.889635	0.0185996
CHID1	AF212229	chitinase domain containing 1	0.829647	0.0186231
MCM2	NM_004526	minichromosome maintenance complex component 2	0.69945	0.0186637
TBC1D21	BE671790	TBC1 domain family, member 21	0.871129	0.0186741
DGAT1	NM_012079	diacylglycerol O-acyltransferase homolog 1 (mouse)	0.79396	0.018716
B9D1	BC002944	B9 protein domain 1	0.810109	0.0187523
C22orf36	AW006520	chromosome 22 open reading frame 36	0.893208	0.0187563
LOC400655	BC013370	hypothetical gene supported by BC013370; BC034583	0.867296	0.0187684
ABHD8	NM_024527	abhydrolase domain containing 8	0.871601	0.0187819
SSR1	BF679286	signal sequence receptor, alpha	0.453393	0.0188186
RHOBTB3	AK023621	Rho-related BTB domain containing 3	0.898018	0.0188343
C9orf142	AI582287	chromosome 9 open reading frame 142	0.836623	0.0188397
EEF1A1	BE964125	eukaryotic translation elongation factor 1 alpha 1	0.823359	0.0188464
WDR64	NM_144625	WD repeat domain 64	0.951837	0.0188607
PAFAH1B2	BC000398	platelet-activating factor acetylhydrolase, isoform Ib, beta subunit 30kDa	0.914394	0.018872
VASH2	NM_024749	vasohibin 2	0.835437	0.0188811
PNPLA4	AI814551	patatin-like phospholipase domain containing 4	0.610577	0.018903
PER1	NM_002616	period homolog 1 (Drosophila)	0.914109	0.0189081
PPP1R11	NM_021959	protein phosphatase 1, regulatory (inhibitor) subunit 11	0.899812	0.0189366
TBC1D13	NM_018201	TBC1 domain family, member 13	0.73714	0.0189404
CCL25	NM_005624	chemokine (C-C motif) ligand 25	0.833439	0.0189417
CRAT	BC000723	carnitine acetyltransferase	0.821111	0.0189659
C6orf47	NM_021184	chromosome 6 open reading frame 47	0.95435	0.0189776
GNMT	AF101477	glycine N-methyltransferase	0.73089	0.0189805
IMPA2	NM_014214	inositol(myo)-1(or 4)-monophosphatase 2	0.768063	0.0189869
C20orf30	NM_014145	chromosome 20 open reading frame 30	0.810005	0.0189924
C11orf68	AF073483	chromosome 11 open reading frame 68	0.873541	0.0190287
SLC5A12	BC029048	solute carrier family 5 (sodium	0.761584	0.0190431
LIM2	NM_030657	lens intrinsic membrane protein 2, 19kDa	0.932428	0.0190654
LOC123688	AW973177	similar to RIKEN cDNA C630028N24 gene	0.784293	0.0190731
TK1	NM_003258	thymidine kinase 1, soluble	0.714604	0.0190802
LOC441383	BC019922	hypothetical gene supported by AF086559; BC065734	0.958087	0.0190918
ELMO3	NM_024712	engulfment and cell motility 3	0.924555	0.019115
SESN2	BF131886	sestrin 2	0.983062	0.0191159
DST	BC004912	dystonin	0.877936	0.0191603
VPS52	AL390171	vacuolar protein sorting 52 homolog (S. cerevisiae)	0.91052	0.0192025
NPM3	NM_006993	nucleophosmin	0.913722	0.0192665
RAB31	BE789881	RAB31, member RAS oncogene family	0.712157	0.0192822
AMZ1	AB075830	archaelysin family metallopeptidase 1	0.79024	0.0193351
CNTLN	AK098502	centlein, centrosomal protein	0.874574	0.0193451
UNC45A	BC006214	unc-45 homolog A (C. elegans)	0.915881	0.0193537
C22orf29	NM_024627	chromosome 22 open reading frame 29	0.873482	0.0193713
RRAD	NM_004165	Ras-related associated with diabetes	0.984529	0.0194281
NME1	NM_002512	non-metastatic cells 1, protein (NM23A) expressed in	0.945665	0.0194391
LOC255480	U47671	hypothetical protein LOC255480	0.822464	0.0194641
LOC285074	AA906142	hypothetical protein LOC285074	0.838948	0.0194641
FTL	BG537190	ferritin, light polypeptide	0.846088	0.0194845
RARS2	AF143874	arginyl-tRNA synthetase 2, mitochondrial	0.879803	0.0194942
ABI2	NM_005759	abl interactor 2	0.878904	0.0195241
SNCA	BG260394	synuclein, alpha (non A4 component of amyloid precursor)	0.945915	0.0195281
EIF4B	NM_001417	eukaryotic translation initiation factor 4B	0.795626	0.0195517
FANCE	NM_021922	Fanconi anemia, complementation group E	0.887873	0.0195832
MRPL34	AB049652	mitochondrial ribosomal protein L34	0.870026	0.0195994
DPYSL2	NM_001386	dihydropyrimidinase-like 2	0.807972	0.0196057
TAF1C	AW015313	TATA box binding protein (TBP)-associated factor, RNA polymerase I, C, 110kDa	0.955732	0.0196358
ZNF672	BG490634	zinc finger protein 672	0.917598	0.0196434
LOX	NM_002317	lysyl oxidase	0.94463	0.0196561
LOC642741	Z98200	similar to ribosomal protein L3	0.719152	0.0196664
ASPN	NM_017680	asporin	0.773599	0.0196749
ELMOD2	AK093087	ELMO	0.681616	0.0197329
DPM3	NM_018973	dolichyl-phosphate mannosyltransferase polypeptide 3	0.864657	0.0197691
PGP	BG284709	phosphoglycolate phosphatase	0.831103	0.0197725
GNAI1	AL049933	guanine nucleotide binding protein (G protein), alpha inhibiting activity polypeptide 1	0.877585	0.0197941
UROD	M14016	uroporphyrinogen decarboxylase	0.747502	0.019807
FBXL4	BF571480	F-box and leucine-rich repeat protein 4	0.758356	0.0198148
VKORC1	NM_024006	vitamin K epoxide reductase complex, subunit 1	0.750576	0.0198393
HEATR7A	AW664013	HEAT repeat containing 7A	0.636625	0.0198511
DNAJC22	NM_024902	DnaJ (Hsp40) homolog, subfamily C, member 22	0.630342	0.019865
EPAG	L22650	early lymphoid activation protein	0.864979	0.0198685
G6PD	NM_000402	glucose-6-phosphate dehydrogenase	0.872892	0.0199108
TMCO5A	AK093126	transmembrane and coiled-coil domains 5A	0.946684	0.0199113
PHF8	AW249934	PHD finger protein 8	0.964115	0.0199556
GPR39	NM_001508	G protein-coupled receptor 39	0.757982	0.0199763
INSR	AA485908	insulin receptor	0.972645	0.0199932
ABCA2	AL162060	ATP-binding cassette, sub-family A (ABC1), member 2	0.825858	0.0200151
PCBD1	NM_000281	pterin-4 alpha-carbinolamine dehydratase	0.891351	0.0200264
LOC339524	AI435440	hypothetical protein LOC339524	0.946753	0.020034
JTB	NM_006694	jumping translocation breakpoint	0.876225	0.0200431
MUTYH	NM_012222	mutY homolog (E. coli)	0.98854	0.0200722
TKT	BF696840	transketolase	0.913164	0.0200855
CDH19	NM_021153	cadherin 19, type 2	0.808122	0.0200903
LOC100130886	NM_017698	hypothetical protein LOC100130886	0.630969	0.0200984
STL	AL713649	Six-twelve leukemia gene	0.775015	0.0201145
MFSD6	NM_017694	major facilitator superfamily domain containing 6	0.786976	0.0201571
MYBL2	NM_002466	v-myb myeloblastosis viral oncogene homolog (avian)-like 2	0.682436	0.0201574
SV2C	AK094917	synaptic vesicle glycoprotein 2C	0.942334	0.0201744
MYADM	BE908995	myeloid-associated differentiation marker	0.879544	0.0202396
PVR	NM_006505	poliovirus receptor	0.871978	0.0202589
ENOX1	NM_017993	ecto-NOX disulfide-thiol exchanger 1	0.971283	0.0202901
HECA	BE676408	headcase homolog (Drosophila)	0.897155	0.0202901
RBMS2	D28483	RNA binding motif, single stranded interacting protein 2	0.966207	0.0202901
NEDD8	NM_006156	neural precursor cell expressed, developmentally down-regulated 8	0.654236	0.0203373
PIGO	BC001030	phosphatidylinositol glycan anchor biosynthesis, class O	0.862348	0.0203433
STRAP	BQ944989	HeLa mRNA isolated as a false positive in a two-hybrid-screen	0.771182	0.0203676
FMN1	R67695	formin 1	0.96475	0.0203953
BCAS2	NM_005872	breast carcinoma amplified sequence 2	0.869936	0.0204328
SP4	NM_003112	Sp4 transcription factor	0.853441	0.0204571
EPB41L4A	BC031042	erythrocyte membrane protein band 4.1 like 4A	0.849233	0.0204779
C11orf63	BC009820	chromosome 11 open reading frame 63	0.923936	0.0204982
PACS1	NM_018026	phosphofurin acidic cluster sorting protein 1	0.916921	0.0205027
DDX51	BC012461	DEAD (Asp-Glu-Ala-Asp) box polypeptide 51	0.93127	0.0205123
CKS2	NM_001827	CDC28 protein kinase regulatory subunit 2	0.865375	0.0205136
TSPAN5	AF065389	tetraspanin 5	0.783313	0.0205202
CASK	AB039327	calcium	0.856797	0.0205267
ZDHHC3	NM_016598	zinc finger, DHHC-type containing 3	0.961149	0.0205466
LYPLA2P1	AL050332	lysophospholipase II pseudogene 1	0.874452	0.0205476
ROMO1	BF381837	reactive oxygen species modulator 1	0.807961	0.0205652
EIF4EBP2	BG106477	eukaryotic translation initiation factor 4E binding protein 2	0.332938	0.0205752
HIST1H3I	NM_003533	histone cluster 1, H3i	0.605366	0.0205771
CMTM4	AK000855	CKLF-like MARVEL transmembrane domain containing 4	0.468089	0.0205929
RHBDF1	NM_022450	rhomboid 5 homolog 1 (Drosophila)	0.976162	0.020596
RAB17	NM_022449	RAB17, member RAS oncogene family	0.796101	0.0206024
TRAM1	NM_014294	translocation associated membrane protein 1	0.89308	0.0206041
OXA1L	BC001669	oxidase (cytochrome c) assembly 1-like	0.855541	0.0206209
C11orf83	AW051379	chromosome 11 open reading frame 83	0.778633	0.0207228
TRAIP	NM_005879	TRAF interacting protein	0.856033	0.0207255
QARS	NM_005051	glutaminyl-tRNA synthetase	0.621844	0.020751
LOC100132214	NM_014147	similar to HSPC047 protein	0.913328	0.0207743
SUMF2	BE349022	sulfatase modifying factor 2	0.686843	0.0208349
TRMT2B	BC007526	TRM2 tRNA methyltransferase 2 homolog B (S. cerevisiae)	0.694684	0.0208354
MFSD10	L11669	major facilitator superfamily domain containing 10	0.771167	0.0208792
UBQLN4	AK023354	ubiquilin 4	0.824144	0.0208856
WARS2	NM_015836	tryptophanyl tRNA synthetase 2, mitochondrial	0.914837	0.0208908
ESR1	M69297	estrogen receptor 1	0.749517	0.0209168
MCM7	D55716	minichromosome maintenance complex component 7	0.814214	0.020948
SFT2D2	AL035297	SFT2 domain containing 2	0.712703	0.0209557
NAPA	BG328781	CDNA FLJ25535 fis, clone CBR08603, highly similar to ALPHA-SOLUBLE NSF ATTACHMENT PROTEIN	0.924019	0.0209695
C18orf56	AW291159	chromosome 18 open reading frame 56	0.771273	0.0209856
UBXN6	NM_025241	UBX domain protein 6	0.878159	0.021006
LOC283922	AK096768	hypothetical protein LOC283922	0.902306	0.0210615
SEPT8	D86957	septin 8	0.864331	0.0210649
LTBP3	NM_021070	latent transforming growth factor beta binding protein 3	0.876244	0.0210688
CAPN5	NM_004055	calpain 5	0.976361	0.0210772
PHGDH	NM_006623	phosphoglycerate dehydrogenase	0.70348	0.0210803
SH3BP2	AB000463	SH3-domain binding protein 2	0.832073	0.0211134
ATF6B	U52696	activating transcription factor 6 beta	0.854454	0.0211219
P4HB	J02783	prolyl 4-hydroxylase, beta polypeptide	0.976662	0.0211769
CXCL14	NM_004887	chemokine (C-X-C motif) ligand 14	0.971905	0.021255
MRPS11	AB049944	mitochondrial ribosomal protein S11	0.798331	0.0212735
STAG3L1	NM_018991	stromal antigen 3-like 1	0.98734	0.0212801
EFS	AB001467	embryonal Fyn-associated substrate	0.930662	0.0212812
MPI	NM_002435	mannose phosphate isomerase	0.675785	0.0212893
C22orf32	AV751709	chromosome 22 open reading frame 32	0.658156	0.0213116
KIAA0114	BG255416	KIAA0114	0.382774	0.0213416
LUZP6	AL533334	leucine zipper protein 6	0.83231	0.0213493
HTR4	Y08756	5-hydroxytryptamine (serotonin) receptor 4	0.839718	0.0213733
ORC5L	AF081459	origin recognition complex, subunit 5-like (yeast)	0.912715	0.0213823
RPS11	NM_001015	ribosomal protein S11	0.875592	0.0213837
SRM	NM_003132	spermidine synthase	0.950418	0.021395
TLE2	NM_003260	transducin-like enhancer of split 2 (E(sp1) homolog, Drosophila)	0.89557	0.0213991
RSRC1	BG398744	arginine	0.827534	0.0213997
NANOS2	BC042883	nanos homolog 2 (Drosophila)	0.951633	0.021407
SEC11A	N99438	SEC11 homolog A (S. cerevisiae)	0.97758	0.0214386
SIN3A	AI760013	SIN3 homolog A, transcription regulator (yeast)	0.389216	0.0214388
BCL2L13	AA156605	BCL2-like 13 (apoptosis facilitator)	0.845978	0.0214978
ACSM2A	AA865601	acyl-CoA synthetase medium-chain family member 2A	0.869706	0.0215346
SF3B2	NM_006842	splicing factor 3b, subunit 2, 145kDa	0.962661	0.0216443
RBM35B	NM_024939	RNA binding motif protein 35B	0.869043	0.0216532
AUP1	NM_012103	ancient ubiquitous protein 1	0.798042	0.0217448
HMGCS2	NM_005518	3-hydroxy-3-methylglutaryl-Coenzyme A synthase 2 (mitochondrial)	0.657297	0.0217476
C19orf62	BC006244	chromosome 19 open reading frame 62	0.831946	0.0217608
PTPRF	NM_002840	protein tyrosine phosphatase, receptor type, F	0.655148	0.0217791
KLF13	AL390127	Kruppel-like factor 13	0.754207	0.0217901
ECHDC3	NM_024693	enoyl Coenzyme A hydratase domain containing 3	0.865036	0.0217906
PDXK	AW262867	pyridoxal (pyridoxine, vitamin B6) kinase	0.834365	0.0217988
TOMM40L	AK022832	translocase of outer mitochondrial membrane 40 homolog (yeast)-like	0.905672	0.0218134
BCKDK	NM_005881	branched chain ketoacid dehydrogenase kinase	0.745111	0.0218192
SLC25A11	AF070548	solute carrier family 25 (mitochondrial carrier; oxoglutarate carrier), member 11	0.76771	0.0218247
DNASE1L1	NM_006730	deoxyribonuclease I-like 1	0.962322	0.0218304
GCAT	Z97630	glycine C-acetyltransferase (2-amino-3-ketobutyrate coenzyme A ligase)	0.685514	0.0218523
NRM	D81048	nurim (nuclear envelope membrane protein)	0.554236	0.0218568
SLC25A19	BC001075	solute carrier family 25 (mitochondrial thiamine pyrophosphate carrier), member 19	0.80532	0.0218904
MLLT11	BC006471	myeloid	0.551132	0.0219088
SEPN1	AL020996	selenoprotein N, 1	0.957029	0.0219344
WTIP	BF111298	Wilms tumor 1 interacting protein	0.783966	0.0219399
CD1E	NM_030893	CD1e molecule	0.96087	0.0219505
CAMTA1	AA724147	Calmodulin binding transcription activator 1, mRNA (cDNA clone IMAGE:5285208)	0.758393	0.0219582
SORL1	AV728268	sortilin-related receptor, L(DLR class) A repeats-containing	0.749939	0.0219709
UGT8	NM_003360	UDP glycosyltransferase 8	0.878457	0.0220205
CTF8	AI309784	chromosome transmission fidelity factor 8 homolog (S. cerevisiae)	0.932277	0.0220224
HSF1	AI393937	heat shock transcription factor 1	0.922703	0.0220436
RPLP0	BC003655	ribosomal protein, large, P0	0.696769	0.0221538
RPL17	BG168283	ribosomal protein L17	0.946977	0.0221717
SLC37A4	AF097831	solute carrier family 37 (glucose-6-phosphate transporter), member 4	0.884688	0.0221744
ESR2	AB006590	estrogen receptor 2 (ER beta)	0.771778	0.022199
SLC25A46	M74089	solute carrier family 25, member 46	0.889038	0.022245
MACROD2	BC035876	MACRO domain containing 2	0.968799	0.0222454
LOC100134190	NM_002332	similar to low density lipoprotein-related protein 1 (alpha-2-macroglobulin receptor)	0.913354	0.0222513
SMTN	AF064238	smoothelin	0.952316	0.0222946
VWA1	NM_022834	von Willebrand factor A domain containing 1	0.853565	0.0223322
OSBPL8	AW978375	oxysterol binding protein-like 8	0.771627	0.0223389
APLP1	U48437	amyloid beta (A4) precursor-like protein 1	0.862434	0.0223617
hCG_16001	BF125158	similar to ribosomal protein L23A	0.880804	0.0223617
HIGD2A	BC000587	HIG1 domain family, member 2A	0.757079	0.0223631
GABRA3	NM_000808	gamma-aminobutyric acid (GABA) A receptor, alpha 3	0.73568	0.0223926
HELB	BC037946	helicase (DNA) B	0.309665	0.0223962
TMEM106C	NM_024056	transmembrane protein 106C	0.755961	0.0223984
RASL11B	NM_023940	RAS-like, family 11, member B	0.818911	0.0224224
PTOV1	AL046054	prostate tumor overexpressed 1	0.794462	0.0224335
PXMP4	BC001147	peroxisomal membrane protein 4, 24kDa	0.54676	0.0224615
ERO1LB	NM_019891	ERO1-like beta (S. cerevisiae)	0.754675	0.0224768
USE1	NM_018467	unconventional SNARE in the ER 1 homolog (S. cerevisiae)	0.760672	0.0225045
C6orf64	AI761426	chromosome 6 open reading frame 64	0.908041	0.0225125
TRAF4	AF082185	TNF receptor-associated factor 4	0.940693	0.0225338
HELLS	NM_018063	helicase, lymphoid-specific	0.599294	0.0225471
SDF2L1	NM_022044	stromal cell-derived factor 2-like 1	0.916431	0.0225964
INPP5A	AF273055	inositol polyphosphate-5-phosphatase, 40kDa	0.865897	0.0226088
SLC38A10	BF304853	solute carrier family 38, member 10	0.906095	0.0226142
C21orf99	NM_153773	chromosome 21 open reading frame 99	0.795094	0.0226912
ASXL2	AW295549	additional sex combs like 2 (Drosophila)	0.5	0.0226979
LOC550631	AA809353	hypothetical LOC550631	0.87008	0.0227071
UCHL1	NM_004181	ubiquitin carboxyl-terminal esterase L1 (ubiquitin thiolesterase)	0.735253	0.0227127
SULT2B1	NM_004605	sulfotransferase family, cytosolic, 2B, member 1	0.815766	0.0227155
QSOX1	NM_002826	quiescin Q6 sulfhydryl oxidase 1	0.812919	0.0227529
FARP1	BF725250	CDEP	0.558228	0.0228027
C9orf5	BG402553	chromosome 9 open reading frame 5	0.841212	0.0228614
DPM2	AF061729	dolichyl-phosphate mannosyltransferase polypeptide 2, regulatory subunit	0.810085	0.0228936
GSG2	AB039834	germ cell associated 2 (haspin)	0.812183	0.0229103
SERPINA6	NM_001756	serpin peptidase inhibitor, clade A (alpha-1 antiproteinase, antitrypsin), member 6	0.849987	0.0229458
LLGL1	D50550	lethal giant larvae homolog 1 (Drosophila)	0.950652	0.0229559
LOC100131861	BF509015	hypothetical protein LOC100131861	0.922276	0.0229656
LLGL2	NM_004524	lethal giant larvae homolog 2 (Drosophila)	0.950339	0.0229905
TPM3	BC000771	tropomyosin 3	0.817723	0.023131
JMJD8	AL577395	jumonji domain containing 8	0.799428	0.0231633
HADHA	U04627	hydroxyacyl-Coenzyme A dehydrogenase	0.752856	0.023206
ATP5G1	AL080089	ATP synthase, H+ transporting, mitochondrial F0 complex, subunit C1 (subunit 9)	0.764441	0.0232178
SPTBN1	BE968833	spectrin, beta, non-erythrocytic 1	0.8107	0.0232207
COX6A1	NM_004373	cytochrome c oxidase subunit VIa polypeptide 1	0.782965	0.0232262
NCOA3	BC036778	Nuclear receptor coactivator (ACTR)	0.829506	0.0232288
RNF219	NM_024546	ring finger protein 219	0.738526	0.0232588
MGC3205	BF343862	hypothetical protein MGC3205	0.76971	0.0233174
SELENBP1	NM_003944	selenium binding protein 1	0.749711	0.0233236
SCD	AA678241	stearoyl-CoA desaturase (delta-9-desaturase)	0.735079	0.0233362
OCEL1	NM_024578	occludin	0.840708	0.0233426
ELL	AL521391	elongation factor RNA polymerase II	0.979098	0.0233712
KRI1	NM_023008	KRI1 homolog (S. cerevisiae)	0.921434	0.0234175
TAF6	NM_005641	TAF6 RNA polymerase II, TATA box binding protein (TBP)-associated factor, 80kDa	0.915886	0.0234255
ANKRD9	AW274264	Ankyrin repeat domain 9 (ANKRD9), mRNA	0.716279	0.0234394
RDH5	U43559	retinol dehydrogenase 5 (11-cis	0.91584	0.0234407
SLC35E1	BE904333	solute carrier family 35, member E1	0.857559	0.0234753
RPS27A	NM_018955	ribosomal protein S27a	0.958879	0.0235012
NODAL	AI670948	nodal homolog (mouse)	0.765689	0.0235248
MAPK15	AA557536	mitogen-activated protein kinase 15	0.76666	0.0235281
BTG3	NM_006806	BTG family, member 3	0.838361	0.0235306
LOC339803	AW327931	hypothetical protein LOC339803	0.667875	0.0235355
PAQR4	AL520675	progestin and adipoQ receptor family member IV	0.845657	0.0236032
DEFB125	NM_153325	defensin, beta 125	0.788289	0.0236127
EDC3	NM_025083	enhancer of mRNA decapping 3 homolog (S. cerevisiae)	0.944328	0.0236868
CREG1	NM_003851	cellular repressor of E1A-stimulated genes 1	0.718443	0.0236877
NAB2	BF337329	NGFI-A binding protein 2 (EGR1 binding protein 2)	0.967049	0.0236965
PDZK1	NM_002614	PDZ domain containing 1	0.694165	0.0236976
LIMS1	AK098109	LIM and senescent cell antigen-like domains 1	0.724641	0.0237114
UBE4B	NM_006048	ubiquitination factor E4B (UFD2 homolog, yeast)	0.745524	0.0237645
B4GALT1	AL574435	Clone p4betaGT	0.711517	0.0237831
PSMD11	AF001212	proteasome (prosome, macropain) 26S subunit, non-ATPase, 11	0.895432	0.0237925
SLC2A14	AL110298	solute carrier family 2 (facilitated glucose transporter), member 14	0.876104	0.0238616
TMBIM6	AF033095	transmembrane BAX inhibitor motif containing 6	0.92449	0.0238868
MTP18	AF060924	mitochondrial protein 18 kDa	0.906591	0.0239081
C22orf28	NM_014306	chromosome 22 open reading frame 28	0.985507	0.0239448
RPS23	AW043594	ribosomal protein S23	0.71725	0.0239573
SLC39A3	BC000085	solute carrier family 39 (zinc transporter), member 3	0.803257	0.0239778
PRR13	NM_018457	proline rich 13	0.968269	0.0239929
CNIH2	AI806692	cornichon homolog 2 (Drosophila)	0.72373	0.0240145
SLC38A4	AF193836	solute carrier family 38, member 4	0.837144	0.0240166
CHD1L	AW665927	CDNA FLJ10480 fis, clone NT2RP2000126, weakly similar to POSSIBLE GLOBAL TRANSCRIPTION ACTIVATOR SNF2L	0.925261	0.0240203
SLC26A11	BE964598	solute carrier family 26, member 11	0.991415	0.0240281
CDC37	U63131	cell division cycle 37 homolog (S. cerevisiae)	0.858181	0.024041
SRC	AF272982	v-src sarcoma (Schmidt-Ruppin A-2) viral oncogene homolog (avian)	0.91686	0.0240493
SMPDL3B	NM_014474	sphingomyelin phosphodiesterase, acid-like 3B	0.83188	0.0240508
SLC4A2	NM_003040	solute carrier family 4, anion exchanger, member 2 (erythrocyte membrane protein band 3-like 1)	0.923658	0.024076
DDX49	AC002985	DEAD (Asp-Glu-Ala-Asp) box polypeptide 49	0.922367	0.0241334
CUEDC1	BC008034	CUE domain containing 1	0.968665	0.0241407
TTYH3	AI934753	tweety homolog 3 (Drosophila)	0.922281	0.0241602
ADCY8	NM_001115	adenylate cyclase 8 (brain)	0.861641	0.0241857
FGD1	NM_004463	FYVE, RhoGEF and PH domain containing 1	0.929478	0.0242082
CDT1	AF321125	chromatin licensing and DNA replication factor 1	0.806633	0.0242456
RPS16	NM_001020	ribosomal protein S16	0.826242	0.0242596
MAP6D1	BC006434	MAP6 domain containing 1	0.704326	0.0242633
MRPL46	NM_022163	mitochondrial ribosomal protein L46	0.94818	0.0243046
LOC728142	BF196752	hypothetical LOC728142	0.673203	0.0243102
LAGE3	NM_006014	L antigen family, member 3	0.781657	0.0243148
LETM2	NM_144652	leucine zipper-EF-hand containing transmembrane protein 2	0.821602	0.0243209
RTN3	NM_006054	reticulon 3	0.881251	0.0243352
ZNHIT1	NM_006349	zinc finger, HIT type 1	0.814625	0.0243395
GLA	NM_000169	galactosidase, alpha	0.858006	0.0243432
GPNMB	NM_002510	glycoprotein (transmembrane) nmb	0.749508	0.0243534
PHKA2	D38616	phosphorylase kinase, alpha 2 (liver)	0.806162	0.0243535
CCDC123	AK001375	MRNA; cDNA DKFZp686G1614 (from clone DKFZp686G1614)	0.906851	0.0243611
PI4KA	NM_002650	phosphatidylinositol 4-kinase, catalytic, alpha	0.866737	0.0243779
SLC1A2	NM_004171	solute carrier family 1 (glial high affinity glutamate transporter), member 2	0.707135	0.0243801
MAGED2	AI924630	melanoma antigen family D, 2	0.783222	0.0244112
BTD	NM_000060	biotinidase	0.813455	0.0244218
LOC171220	U72518	destrin-2 pseudogene	0.830187	0.0244263
FAM176B	NM_018166	family with sequence similarity 176, member B	0.939089	0.0244297
FAM176B	BC006241	family with sequence similarity 176, member B	0.939089	0.0244297
LOC613266	BC043571	hypothetical LOC613266	0.903465	0.0244373
WTAP	AL583911	Wilms tumor 1 associated protein	0.981159	0.0244373
DHX34	AA039439	DEAH (Asp-Glu-Ala-His) box polypeptide 34	0.892983	0.0244801
TRIM26	BM799976	Tripartite motif-containing 26, mRNA (cDNA clone MGC:12710 IMAGE:3954669)	0.89442	0.0245057
C11orf10	NM_014206	chromosome 11 open reading frame 10	0.773265	0.0245191
PECI	NM_006117	peroxisomal D3,D2-enoyl-CoA isomerase	0.716597	0.0245318
LSM1	NM_014462	LSM1 homolog, U6 small nuclear RNA associated (S. cerevisiae)	0.86344	0.0245372
DNASE2	AB004574	deoxyribonuclease II, lysosomal	0.943513	0.0245377
KATNAL2	AL512748	katanin p60 subunit A-like 2	0.673818	0.0245468
PSMB6	BC000835	proteasome (prosome, macropain) subunit, beta type, 6	0.851839	0.0245676
RPS10	NM_001014	ribosomal protein S10	0.867972	0.024573
LOC146443	AI637729	hypothetical protein LOC146443	0.853486	0.0246048
SCNN1A	NM_001038	sodium channel, nonvoltage-gated 1 alpha	0.943938	0.0246178
SSR4	NM_006280	signal sequence receptor, delta (translocon-associated protein delta)	0.74961	0.0246438
CD109	BF978262	CD109 molecule	0.683893	0.024654
IGHMBP2	H46022	immunoglobulin mu binding protein 2	0.800782	0.0247015
C8orf55	NM_016647	chromosome 8 open reading frame 55	0.722485	0.0247067
LOC440288	BF982733	similar to FLJ16518 protein	0.742698	0.0247152
BCL2L1	NM_001191	BCL2-like 1	0.958561	0.0248261
MOBKL2B	NM_024761	MOB1, Mps One Binder kinase activator-like 2B (yeast)	0.900757	0.0248446
SOX15	NM_006942	SRY (sex determining region Y)-box 15	0.958344	0.0248806
WDR55	BC002482	WD repeat domain 55	0.841877	0.0248884
DALRD3	NM_018114	DALR anticodon binding domain containing 3	0.839716	0.0249131
ICOSLG	AF289028	inducible T-cell co-stimulator ligand	0.932651	0.0249191
PCDHB13	NM_018933	protocadherin beta 13	0.814851	0.0249847
NSMCE1	AF161451	non-SMC element 1 homolog (S. cerevisiae)	0.731722	0.0250009
PVT1	BM821521	Pvt1 oncogene (non-protein coding)	0.937245	0.0250039
ELAVL3	R20763	ELAV (embryonic lethal, abnormal vision, Drosophila)-like 3 (Hu antigen C)	0.840093	0.0250325
AIG1	AK001347	androgen-induced 1	0.768404	0.0250417
D4S234E	AL157493	DNA segment on chromosome 4 (unique) 234 expressed sequence	0.953431	0.0250528
TSC22D2	NM_014779	TSC22 domain family, member 2	0.969954	0.0250844
PFKL	NM_002626	phosphofructokinase, liver	0.89199	0.0251033
ACTR1B	NM_005735	ARP1 actin-related protein 1 homolog B, centractin beta (yeast)	0.665025	0.0251204
STK32C	BF508609	serine	0.882358	0.0251229
GNB2L1	NM_006098	guanine nucleotide binding protein (G protein), beta polypeptide 2-like 1	0.809331	0.0251296
JMJD4	AA582199	jumonji domain containing 4	0.861204	0.0251342
LOC284017	AK021878	hypothetical protein LOC284017	0.803695	0.0251628
MRPL51	AF151075	mitochondrial ribosomal protein L51	0.780916	0.0251757
RPL30	L05095	ribosomal protein L30	0.886173	0.0252324
ZNF264	NM_003417	zinc finger protein 264	0.893734	0.025239
STAM	NM_003473	signal transducing adaptor molecule (SH3 domain and ITAM motif) 1	0.894569	0.0252398
FLNB	AV712733	filamin B, beta (actin binding protein 278)	0.859672	0.0253018
IQCH	AA789195	IQ motif containing H	0.775255	0.0253058
GOLGA3	N25563	golgi autoantigen, golgin subfamily a, 3	0.760794	0.0253307
WFS1	BC030130	Wolfram syndrome 1 (wolframin)	0.87288	0.0253493
ADAM18	BC034624	ADAM metallopeptidase domain 18	0.906263	0.0253916
RAD52	AF125950	RAD52 homolog (S. cerevisiae)	0.895934	0.0254342
PDK2	AL574319	pyruvate dehydrogenase kinase, isozyme 2	0.793675	0.0254524
DUS4L	NM_007016	dihydrouridine synthase 4-like (S. cerevisiae)	0.864455	0.0255012
MCM5	NM_006739	minichromosome maintenance complex component 5	0.751031	0.0255171
TRAPPC2L	NM_016209	trafficking protein particle complex 2-like	0.796815	0.025522
CCDC56	NM_014019	coiled-coil domain containing 56	0.767603	0.0255273
NMRAL1	BC002927	NmrA-like family domain containing 1	0.821137	0.0255458
H1FX	NM_006026	H1 histone family, member X	0.857152	0.0255508
CYP2W1	NM_017781	cytochrome P450, family 2, subfamily W, polypeptide 1	0.861474	0.025553
STX3	BE966922	syntaxin 3	0.791542	0.025577
DTD1	NM_080820	D-tyrosyl-tRNA deacylase 1 homolog (S. cerevisiae)	0.918957	0.0255794
ARL6IP5	NM_006407	ADP-ribosylation-like factor 6 interacting protein 5	0.698362	0.0255856
WDR6	AK001080	WD repeat domain 6	0.805173	0.0255908
FAM185A	AI335543	family with sequence similarity 185, member A	0.857082	0.0256099
UTRN	N66570	utrophin	0.724101	0.0256328
RSL1D1	AK000822	ribosomal L1 domain containing 1	0.900298	0.025641
VPS53	BF115777	vacuolar protein sorting 53 homolog (S. cerevisiae)	0.861803	0.0256464
C19orf54	AA001552	chromosome 19 open reading frame 54	0.895617	0.0256626
NUCB1	BC002356	nucleobindin 1	0.919567	0.0256784
C13orf33	AL832478	Chromosome 13 open reading frame 33, mRNA (cDNA clone MGC:48970 IMAGE:5590156)	0.762599	0.0256822
FKBP8	L37033	FK506 binding protein 8, 38kDa	0.756541	0.0257135
GLMN	AA814383	glomulin, FKBP associated protein	0.826291	0.0257526
LOC440338	AU143918	hypothetical gene supported by AJ002784	0.905128	0.0257526
SSRP1	NM_003146	structure specific recognition protein 1	0.888233	0.0258045
DYNC1I1	NM_004411	dynein, cytoplasmic 1, intermediate chain 1	0.785723	0.0258073
MACC1	AL359055	metastasis associated in colon cancer 1	0.489298	0.0258242
FLJ31715	NM_152532	hypothetical protein FLJ31715	0.814752	0.0258468
ATP6V0A2	BG106215	ATPase, H+ transporting, lysosomal V0 subunit a2	0.518421	0.0258483
RPLP1	NM_001003	ribosomal protein, large, P1	0.754475	0.0258557
LOC388076	AA976278	hypothetical LOC388076	0.674376	0.0258566
NUMA1	AI337584	nuclear mitotic apparatus protein 1	0.912304	0.0258623
LOC644620	AI190603	CDNA clone IMAGE:4827374	0.901636	0.0258686
GPRASP1	NM_014710	G protein-coupled receptor associated sorting protein 1	0.67408	0.0259023
CP	AI922198	ceruloplasmin (ferroxidase)	0.787742	0.0259059
SPOCD1	AK096192	SPOC domain containing 1	0.863364	0.0259323
ATP9B	AI335888	ATPase, class II, type 9B	0.73755	0.0259499
C1orf56	BE222214	chromosome 1 open reading frame 56	0.87553	0.0259663
DBNL	AF077353	drebrin-like	0.807727	0.025979
RAB3B	BC005035	RAB3B, member RAS oncogene family	0.772178	0.0260201
RP11-167P23.2	AJ318895	XAGE-4 protein	0.822548	0.0260639
SSR3	AI939474	CDNA FLJ52061 complete cds, highly similar to Translocon-associated protein subunit gamma	0.732376	0.0260666
MGC26356	BC028359	similar to zinc finger protein 595	0.719792	0.0261534
COL21A1	NM_030820	collagen, type XXI, alpha 1	0.988276	0.0261547
SDHA	NM_004168	succinate dehydrogenase complex, subunit A, flavoprotein (Fp)	0.976363	0.026158
LOC144571	AK056852	hypothetical protein LOC144571	0.930436	0.0261629
AP4M1	AF155158	adaptor-related protein complex 4, mu 1 subunit	0.879414	0.0261696
GALE	NM_000403	UDP-galactose-4-epimerase	0.75382	0.0261841
ZFP36	NM_003407	zinc finger protein 36, C3H type, homolog (mouse)	0.851314	0.0262084
UCN3	NM_053049	urocortin 3 (stresscopin)	0.844397	0.026223
PPAPDC1A	BF130943	phosphatidic acid phosphatase type 2 domain containing 1A	0.828079	0.0262435
HSPG2	M85289	heparan sulfate proteoglycan 2	0.985087	0.026283
ST3GAL2	NM_006927	ST3 beta-galactoside alpha-2,3-sialyltransferase 2	0.919321	0.0262834
CNIH	NM_005776	cornichon homolog (Drosophila)	0.901019	0.0262847
LOC100129975	BG151284	similar to ribosomal protein L10	0.4103	0.0263496
TMEM14B	BC001033	transmembrane protein 14B	0.815238	0.0263632
ALDH1A1	NM_000689	aldehyde dehydrogenase 1 family, member A1	0.880172	0.0263667
ITGAV	AI093579	integrin, alpha V (vitronectin receptor, alpha polypeptide, antigen CD51)	0.586417	0.0263755
HSPC152	NM_016404	hypothetical protein HSPC152	0.960685	0.0264055
EFCAB6	Z82201	EF-hand calcium binding domain 6	0.923041	0.0264446
CMTM6	AF116694	CKLF-like MARVEL transmembrane domain containing 6	0.368421	0.0264647
EBP	AV702405	emopamil binding protein (sterol isomerase)	0.756323	0.0264759
YES1	AF119914	v-yes-1 Yamaguchi sarcoma viral oncogene homolog 1	0.906555	0.0264974
PREX1	BF308645	phosphatidylinositol-3,4,5-trisphosphate-dependent Rac exchange factor 1	0.773519	0.0265157
DTNB	Y15718	dystrobrevin, beta	0.828742	0.0265416
TRIM16L	BC021296	tripartite motif-containing 16-like	0.855707	0.0265704
PYCR2	AL561868	pyrroline-5-carboxylate reductase family, member 2	0.942393	0.0265836
RXFP2	AF453828	relaxin	0.938891	0.0266038
SFRS16	NM_007056	splicing factor, arginine	0.946519	0.0266079
STAMBPL1	NM_017597	CDNA FLJ33359 fis, clone BRACE2005243, highly similar to AMSH-like protease (EC 3.1.2.15)	0.837707	0.0266224
SEMA4A	NM_022367	sema domain, immunoglobulin domain (Ig), transmembrane domain (TM) and short cytoplasmic domain, (semaphorin) 4A	0.925409	0.0266641
CANX	M94859	calnexin	0.99337	0.0266856
AMFR	AF124145	autocrine motility factor receptor	0.840136	0.0267615
TXNDC13	AL544094	thioredoxin domain containing 13	0.662398	0.026774
RNASEH2C	BF982002	ribonuclease H2, subunit C	0.715553	0.0267748
SNORA21	AK025200	small nucleolar RNA, H	0.878367	0.0268081
ERI3	BC001072	exoribonuclease 3	0.911163	0.0268643
AHNAK	AA523289	AHNAK nucleoprotein	0.806843	0.0268694
WDR90	AL043021	WD repeat domain 90	0.911753	0.0268871
SYT12	AU158606	Synaptotagmin XII, mRNA (cDNA clone MGC:46295 IMAGE:5770140)	0.867842	0.0269285
PLP2	NM_002668	proteolipid protein 2 (colonic epithelium-enriched)	0.772839	0.0269315
SGSM3	NM_015705	small G protein signaling modulator 3	0.821035	0.0269387
HADHB	NM_000183	hydroxyacyl-Coenzyme A dehydrogenase	0.885842	0.0269525
MBTPS1	BE890314	membrane-bound transcription factor peptidase, site 1	0.858814	0.0269548
SARS	NM_006513	seryl-tRNA synthetase	0.926633	0.0269663
IL23R	NM_144701	interleukin 23 receptor	0.93503	0.0270201
TMC6	NM_007267	transmembrane channel-like 6	0.928776	0.0270694
RP11-408E5.4	AL139327	hCG1646718	0.783785	0.0271199
LOC441642	AJ224081	similar to hCG27427	0.780447	0.0271205
LONRF2	AV709727	LON peptidase N-terminal domain and ring finger 2	0.736157	0.0271369
FLJ46875	AI866583	hypothetical LOC440918	0.785344	0.0271632
LPGAT1	BC034621	lysophosphatidylglycerol acyltransferase 1	0.865095	0.027201
FLT1	NM_002019	fms-related tyrosine kinase 1 (vascular endothelial growth factor	0.916057	0.0272042
C16orf13	BC007207	chromosome 16 open reading frame 13	0.716472	0.02721
SHMT2	NM_005412	serine hydroxymethyltransferase 2 (mitochondrial)	0.885182	0.0272355
GNAI3	J03198	guanine nucleotide binding protein (G protein), alpha inhibiting activity polypeptide 3	0.855301	0.0272445
PDE7A	AW269834	phosphodiesterase 7A	0.94372	0.0272814
PVRL4	AF160477	poliovirus receptor-related 4	0.97447	0.0273148
LOC729776	AI051046	hypothetical LOC729776	0.539874	0.0273499
NUDT13	W80642	nudix (nucleoside diphosphate linked moiety X)-type motif 13	0.785801	0.0273642
ALDH9A1	NM_000696	aldehyde dehydrogenase 9 family, member A1	0.985873	0.0273776
APH1A	AY113699	anterior pharynx defective 1 homolog A (C. elegans)	0.850671	0.0273985
SLC30A1	AI553933	solute carrier family 30 (zinc transporter), member 1	0.921834	0.027463
TSPAN17	BG769410	tetraspanin 17	0.912595	0.0274802
KLF9	NM_001206	Kruppel-like factor 9	0.816024	0.0275158
ADPRHL1	AI243209	ADP-ribosylhydrolase like 1	0.744638	0.0275475
F11R	AF191495	F11 receptor	0.84606	0.0275481
BAP1	NM_004656	BRCA1 associated protein-1 (ubiquitin carboxy-terminal hydrolase)	0.882978	0.0275792
ACTL6B	NM_016188	actin-like 6B	0.857392	0.0276152
GLUD1	AI339331	glutamate dehydrogenase 1	0.838278	0.0276171
ADCY6	AF250226	adenylate cyclase 6	0.912985	0.0276335
OGDHL	NM_018245	oxoglutarate dehydrogenase-like	0.853219	0.0276915
TTL	BE964048	tubulin tyrosine ligase	0.78957	0.0277103
NDUFV1	AF092131	NADH dehydrogenase (ubiquinone) flavoprotein 1, 51kDa	0.850203	0.0277286
CLIC3	NM_004669	chloride intracellular channel 3	0.605062	0.0277327
STYK1	NM_018423	serine	0.88876	0.0277768
MRPL51	AB049959	mitochondrial ribosomal protein L51	0.804454	0.0278156
TBX18	AL035694	T-box 18	0.912318	0.0278183
C19orf22	W07773	chromosome 19 open reading frame 22	0.960205	0.0278294
MAPT	NM_016835	microtubule-associated protein tau	0.684869	0.0278436
ZNF404	AA084273	zinc finger protein 404	0.569277	0.0278765
TBL1Y	AF332222	transducin (beta)-like 1Y-linked	0.887193	0.0278883
YY1	AK025731	YY1 transcription factor	0.706987	0.0279109
RIMBP2	AB002316	RIMS binding protein 2	0.97317	0.027921
MXD4	AK026392	MAX dimerization protein 4	0.87003	0.0279219
ERGIC1	AF267855	endoplasmic reticulum-golgi intermediate compartment (ERGIC) 1	0.89796	0.0279307
VAT1	BC001913	vesicle amine transport protein 1 homolog (T. californica)	0.733901	0.02796
NKD1	AF358135	naked cuticle homolog 1 (Drosophila)	0.876553	0.0279622
KIAA1430	AI912523	KIAA1430	0.737373	0.0279663
NCAPD3	AI796581	non-SMC condensin II complex, subunit D3	0.889829	0.0280024
CYFIP2	AL161999	cytoplasmic FMR1 interacting protein 2	0.592723	0.0280212
HSD11B1L	BC018336	hydroxysteroid (11-beta) dehydrogenase 1-like	0.683183	0.0280281
SLC48A1	NM_017842	solute carrier family 48 (heme transporter), member 1	0.81482	0.0280387
LOC254559	AA437272	hypothetical LOC254559	0.916591	0.0280472
ZNF652	AA526904	Homo sapiens, clone IMAGE:4148741, mRNA	0.758912	0.0280897
WDR20	BC030654	WD repeat domain 20	0.918094	0.0280998
DPY19L1	AB020684	dpy-19-like 1 (C. elegans)	0.71719	0.0281049
ACAD9	BC001817	acyl-Coenzyme A dehydrogenase family, member 9	0.869885	0.0281324
COPS6	NM_006833	COP9 constitutive photomorphogenic homolog subunit 6 (Arabidopsis)	0.826689	0.0281425
RAB40C	BE965869	RAB40C, member RAS oncogene family	0.937601	0.0281919
FBXL18	AA192760	F-box and leucine-rich repeat protein 18	0.651745	0.0281924
PCDHB4	NM_018938	protocadherin beta 4	0.8684	0.0282002
NCSTN	AI634534	nicastrin	0.86995	0.02822
LPHN2	NM_012302	latrophilin 2	0.964586	0.0282328
ATG4B	AA532726	ATG4 autophagy related 4 homolog B (S. cerevisiae)	0.964792	0.0282442
AGBL3	BC030651	ATP	0.934856	0.0282895
MLPH	NM_024101	melanophilin	0.908228	0.0283076
LOC100132279	BF679507	hypothetical protein LOC100132279	0.930751	0.0283175
LOC728613	AA960804	programmed cell death 6 pseudogene	0.704251	0.0283368
ALS2CR11	BC030659	amyotrophic lateral sclerosis 2 (juvenile) chromosome region, candidate 11	0.946506	0.0283606
LOC644315	AI805587	similar to ribosomal protein S7	0.733036	0.0283721
SAMD10	BF795456	sterile alpha motif domain containing 10	0.787524	0.0283958
SNX13	AL353943	sorting nexin 13	0.821995	0.0284333
TPP1	BG231932	tripeptidyl peptidase I	0.856498	0.0284373
GRIK4	NM_014619	glutamate receptor, ionotropic, kainate 4	0.680664	0.0284381
PCYOX1	N45309	prenylcysteine oxidase 1	0.49141	0.0284576
TMEM185A	BC022405	transmembrane protein 185A	0.940913	0.0284793
BAI2	NM_001703	brain-specific angiogenesis inhibitor 2	0.953746	0.0284916
MLEC	NM_014730	malectin	0.583806	0.0285077
MRPL38	BE855557	mitochondrial ribosomal protein L38	0.898516	0.0285206
P2RY10	NM_014499	purinergic receptor P2Y, G-protein coupled, 10	0.837777	0.0285413
H2AFJ	AW241813	H2A histone family, member J	0.834719	0.0285451
NAAA	AK024677	N-acylethanolamine acid amidase	0.730688	0.0285505
PIGS	BC001319	phosphatidylinositol glycan anchor biosynthesis, class S	0.816796	0.0285683
IAH1	AI829927	isoamyl acetate-hydrolyzing esterase 1 homolog (S. cerevisiae)	0.885619	0.0286364
C6orf130	AL031778	chromosome 6 open reading frame 130	0.863263	0.0286936
PPIL2	NM_014337	peptidylprolyl isomerase (cyclophilin)-like 2	0.995256	0.0287176
WDR61	AL109709	CDNA FLJ61675 complete cds, highly similar to WD repeat protein 61	0.84627	0.0287411
ACY1	NM_000666	aminoacylase 1	0.705631	0.0288305
BCL6	S67779	B-cell CLL	0.935616	0.0288365
ICAM2	AA126728	intercellular adhesion molecule 2	0.924627	0.0288579
OR51E2	AF311306	olfactory receptor, family 51, subfamily E, member 2	0.515723	0.0288579
PLTP	NM_006227	phospholipid transfer protein	0.940971	0.0288579
UPP2	AW242408	uridine phosphorylase 2	0.793233	0.0288579
MIPEP	U80034	mitochondrial intermediate peptidase	0.974363	0.0288662
LOC100129673	AI693543	PREDICTED: Homo sapiens similar to hCG2042915 (LOC100129673), mRNA	0.574527	0.0288802
APEX1	M80261	APEX nuclease (multifunctional DNA repair enzyme) 1	0.8129	0.0288883
NDUFB9	AF261090	NADH dehydrogenase (ubiquinone) 1 beta subcomplex, 9, 22kDa	0.753281	0.0289059
PNPLA2	BF570210	patatin-like phospholipase domain containing 2	0.821166	0.0289219
FDFT1	BC003573	farnesyl-diphosphate farnesyltransferase 1	0.788564	0.0289227
ZNF71	AC007228	zinc finger protein 71	0.904195	0.0289228
JOSD1	NM_014876	Josephin domain containing 1	0.907305	0.0289231
C6orf173	BG492359	chromosome 6 open reading frame 173	0.889845	0.0289249
ICA1	NM_022307	islet cell autoantigen 1, 69kDa	0.874691	0.0289281
DDB1	L40326	damage-specific DNA binding protein 1, 127kDa	0.81344	0.028944
BCR	T30183	breakpoint cluster region	0.625251	0.0289586
NPY5R	NM_006174	neuropeptide Y receptor Y5	0.58406	0.0289689
INSIG2	AL080184	insulin induced gene 2	0.699912	0.0289961
C7orf50	BC006224	chromosome 7 open reading frame 50	0.769913	0.0290201
SFRS12	BF508665	CDNA FLJ34439 fis, clone HLUNG2001146, highly similar to Splicing factor, arginine	0.875105	0.029028
SPAG7	NM_004890	sperm associated antigen 7	0.955531	0.0290625
C1orf96	NM_145257	chromosome 1 open reading frame 96	0.909462	0.0290822
ABHD5	NM_016006	abhydrolase domain containing 5	0.832774	0.0290855
GPR172A	AK021918	G protein-coupled receptor 172A	0.9225	0.0291025
E2F1	NM_005225	E2F transcription factor 1	0.75752	0.029103
RNF123	NM_022064	ring finger protein 123	0.902022	0.0292074
COQ9	AC004382	coenzyme Q9 homolog (S. cerevisiae)	0.969188	0.0292187
PCDHB3	NM_018937	protocadherin beta 3	0.61955	0.0292248
GJD3	BF508941	gap junction protein, delta 3, 31.9kDa	0.724007	0.0293006
MANBAL	AL034422	mannosidase, beta A, lysosomal-like	0.874953	0.0293194
KLRG2	AW197495	killer cell lectin-like receptor subfamily G, member 2	0.77291	0.0293258
DBN1	NM_004395	drebrin 1	0.948081	0.0293288
GPS1	NM_004127	G protein pathway suppressor 1	0.876372	0.0293337
FUT5	BE741920	fucosyltransferase 5 (alpha (1,3) fucosyltransferase)	0.757266	0.0293554
SMPD1	M59916	sphingomyelin phosphodiesterase 1, acid lysosomal	0.993042	0.0293743
ODZ1	NM_014253	odz, odd Oz	0.805118	0.0293759
ETHE1	NM_014297	ethylmalonic encephalopathy 1	0.771208	0.0294218
RPL28	AK025866	ribosomal protein L28	0.58453	0.0294886
CNNM3	NM_017623	cyclin M3	0.781331	0.0295295
EHD2	AI417917	EH-domain containing 2	0.941541	0.0295391
FLJ45983	AA846824	hypothetical LOC399717	0.657262	0.0295398
SEC13	NM_030673	SEC13 homolog (S. cerevisiae)	0.879607	0.02955
YIPF3	AK021433	Yip1 domain family, member 3	0.833158	0.0295809
ARSI	AI376957	arylsulfatase family, member I	0.869333	0.0295844
ZFYVE27	AA205754	zinc finger, FYVE domain containing 27	0.895629	0.0295844
LOC100128098	AA609183	hypothetical protein LOC100128098	0.825377	0.0296004
CYP39A1	AI796334	cytochrome P450, family 39, subfamily A, polypeptide 1	0.568966	0.0296231
MED16	AW262690	mediator complex subunit 16	0.87114	0.0296386
CLDND1	AF161522	claudin domain containing 1	0.959588	0.0296566
LOC440888	AY026351	ARP3 actin-related protein 3 homolog B pseudogene	0.789054	0.0296566
VEPH1	AK022666	ventricular zone expressed PH domain homolog 1 (zebrafish)	0.723066	0.0296688
PRDX5	AF197952	peroxiredoxin 5	0.864857	0.0296722
OCM	NM_006188	oncomodulin	0.921237	0.0296735
SPATA20	NM_022827	spermatogenesis associated 20	0.747338	0.0297213
LOC100127980	AA781404	hypothetical protein LOC100127980	0.780427	0.0297467
ERGIC3	AF308298	ERGIC and golgi 3	0.954069	0.0297556
CDC42BPG	Y12337	CDC42 binding protein kinase gamma (DMPK-like)	0.842736	0.0297618
CA8	BC015531	carbonic anhydrase VIII	0.957386	0.0297711
PARVA	AK022316	parvin, alpha	0.910882	0.0298457
PC	NM_022172	pyruvate carboxylase	0.883516	0.0298973
HCFC1R1	AA436930	host cell factor C1 regulator 1 (XPO1 dependent)	0.68833	0.029928
SEPX1	NM_016332	selenoprotein X, 1	0.81215	0.0299382
FLJ34208	AK094122	hypothetical gene supported by AK091527	0.788282	0.0299406
POLD4	NM_021173	polymerase (DNA-directed), delta 4	0.783789	0.0299735
RNASEH2A	NM_006397	ribonuclease H2, subunit A	0.81759	0.0299807
CCDC90A	BF507383	Coiled-coil domain containing 90A, mRNA (cDNA clone MGC:16830 IMAGE:3886144)	0.651337	0.0299841
LGTN	NM_006893	ligatin	0.688884	0.0300274
MCM6	NM_005915	minichromosome maintenance complex component 6	0.628206	0.0300284
LOC149832	AU151357	hypothetical protein LOC149832	0.540866	0.0300432
SH2B1	AF227968	SH2B adaptor protein 1	0.928354	0.0300626
LOC729355	NM_015369	similar to TP53TG3 protein	0.979324	0.0300659
C9orf119	BG541668	chromosome 9 open reading frame 119	0.779778	0.0300693
TSPAN13	NM_014399	tetraspanin 13	0.882113	0.0300842
MBOAT7	BC003164	membrane bound O-acyltransferase domain containing 7	0.873187	0.0301239
LOC100132815	AW274874	CDNA FLJ32177 fis, clone PLACE6001294	0.702104	0.030134
MUT	AI433712	methylmalonyl Coenzyme A mutase	0.90869	0.0301458
RPS19	BE259729	ribosomal protein S19	0.774478	0.0301471
C6orf182	AK027189	Chromosome 6 open reading frame 182, mRNA (cDNA clone MGC:21731 IMAGE:4514050)	0.784	0.0301551
MMGT1	BF978280	membrane magnesium transporter 1	0.71244	0.0301593
EIF3K	AW083133	eukaryotic translation initiation factor 3, subunit K	0.898396	0.0301663
KRT71	AI190071	keratin 71	0.79644	0.030167
HP1BP3	BC022342	heterochromatin protein 1, binding protein 3	0.895575	0.0302227
LHX2	NM_004789	LIM homeobox 2	0.94114	0.0302549
OPA3	NM_025136	optic atrophy 3 (autosomal recessive, with chorea and spastic paraplegia)	0.880453	0.0302741
FZD7	NM_003507	frizzled homolog 7 (Drosophila)	0.817611	0.0303162
PRPF38A	AL521713	PRP38 pre-mRNA processing factor 38 (yeast) domain containing A	0.872373	0.0303281
LOC730051	AK022663	similar to hCG2044798	0.823569	0.0303402
ADSSL1	BF593252	adenylosuccinate synthase like 1	0.814798	0.0303771
H2BFXP	Z73497	H2B histone family, member X, pseudogene	0.885938	0.0304298
PRKAB2	NM_005399	protein kinase, AMP-activated, beta 2 non-catalytic subunit	0.772476	0.0304315
LOC645188	BG773235	hypothetical LOC645188	0.9165	0.0304644
GRIK3	NM_000831	glutamate receptor, ionotropic, kainate 3	0.828048	0.0304958
C5orf24	BF436799	chromosome 5 open reading frame 24	0.892799	0.0305031
CARHSP1	NM_014316	calcium regulated heat stable protein 1, 24kDa	0.737788	0.0305661
GTF2H4	NM_001517	general transcription factor IIH, polypeptide 4, 52kDa	0.791522	0.030609
HFE	AF144244	hemochromatosis	0.527436	0.0306201
CD82	NM_002231	CD82 molecule	0.871162	0.0306338
MAN2C1	NM_006715	mannosidase, alpha, class 2C, member 1	0.8387	0.0306367
BCS1L	NM_004328	BCS1-like (yeast)	0.815048	0.0306395
C2orf44	NM_025203	chromosome 2 open reading frame 44	0.856118	0.0306636
FAT1	NM_005245	FAT tumor suppressor homolog 1 (Drosophila)	0.861298	0.0306833
NDUFS5	NM_004552	NADH dehydrogenase (ubiquinone) Fe-S protein 5, 15kDa (NADH-coenzyme Q reductase)	0.891832	0.0307046
HOXB5	AI052747	homeobox B5	0.923172	0.0307086
MSRB3	AL048386	methionine sulfoxide reductase B3	0.67342	0.0307086
PNPLA6	NM_006702	patatin-like phospholipase domain containing 6	0.854932	0.0307116
FBXO22	NM_012170	F-box protein 22	0.872388	0.0307349
CFL2	BF576053	cofilin 2 (muscle)	0.848613	0.0307602
SEPT9	AB023208	septin 9	0.959681	0.0307771
SLC25A10	NM_012140	solute carrier family 25 (mitochondrial carrier; dicarboxylate transporter), member 10	0.7717	0.0307876
SHARPIN	NM_030974	SHANK-associated RH domain interactor	0.885711	0.0308255
RAB6A	AL136727	RAB6A, member RAS oncogene family	0.901295	0.030839
PGLS	BC017706	6-phosphogluconolactonase	0.813519	0.0308469
NPW	AI868441	neuropeptide W	0.800692	0.0308498
FLJ41352	NM_017951	FLJ41352 protein	0.906902	0.0308751
LASP1	NM_006148	LIM and SH3 protein 1	0.706081	0.0308865
HIATL2	BC005058	hippocampus abundant transcript-like 2	0.919402	0.0308961
C6orf48	NM_016947	chromosome 6 open reading frame 48	0.84129	0.0309256
LSM2	AF196468	LSM2 homolog, U6 small nuclear RNA associated (S. cerevisiae)	0.864849	0.0309268
UCK1	AK022317	uridine-cytidine kinase 1	0.886754	0.0309876
GRWD1	AF337808	glutamate-rich WD repeat containing 1	0.969367	0.0310065
CCDC11	NM_145020	coiled-coil domain containing 11	0.877155	0.0310091
OGFOD2	AI309636	2-oxoglutarate and iron-dependent oxygenase domain containing 2	0.756383	0.0310281
TBC1D16	AL157485	TBC1 domain family, member 16	0.753767	0.031098
PSAP	NM_002778	prosaposin	0.964531	0.0311108
FPGS	NM_004957	folylpolyglutamate synthase	0.908375	0.0311236
PDZD11	AF151061	PDZ domain containing 11	0.697088	0.0311297
DNM2	AK097967	dynamin 2	0.972597	0.0311361
GANAB	W87689	glucosidase, alpha; neutral AB	0.929641	0.0311697
TSGA13	NM_052933	testis specific, 13	0.910883	0.0312316
C20orf43	NM_016407	chromosome 20 open reading frame 43	0.877116	0.0312444
XG	AF380356	Xg blood group	0.763047	0.0312485
DKKL1	NM_014419	dickkopf-like 1 (soggy)	0.893374	0.0312642
NAGS	AV696264	N-acetylglutamate synthase	0.782258	0.0312788
FRMD4A	R19413	FERM domain containing 4A	0.813158	0.0312816
GPR77	NM_018485	G protein-coupled receptor 77	0.679934	0.0312851
EIF5A	BF541557	eukaryotic translation initiation factor 5A	0.839785	0.0312895
XCL1	NM_002995	chemokine (C motif) ligand 1	0.976558	0.0313792
DNAJC12	NM_021800	DnaJ (Hsp40) homolog, subfamily C, member 12	0.911373	0.0314466
LETM1	NM_012318	leucine zipper-EF-hand containing transmembrane protein 1	0.900175	0.0314512
BAT3	BG028844	HLA-B associated transcript 3	0.856138	0.0314547
KATNB1	NM_005886	katanin p80 (WD repeat containing) subunit B 1	0.942852	0.0315086
SUSD3	AW966474	sushi domain containing 3	0.980755	0.0315468
ENTPD6	NM_001247	ectonucleoside triphosphate diphosphohydrolase 6 (putative function)	0.994387	0.0315469
BPGM	NM_001724	2,3-bisphosphoglycerate mutase	0.652162	0.0315474
AKT1S1	BE790884	AKT1 substrate 1 (proline-rich)	0.886613	0.0315568
CCNI	AF135162	cyclin I	0.815171	0.0315689
PNMA2	AF286487	paraneoplastic antigen MA2	0.938367	0.0315891
ADAM22	BC036029	ADAM metallopeptidase domain 22	0.876182	0.0316006
YIPF2	NM_024029	Yip1 domain family, member 2	0.862652	0.0316051
LOC728264	AI417267	hypothetical protein LOC728264	0.689193	0.0316069
LOC100131980	BF509407	similar to zinc finger protein 705A	0.801465	0.0316092
TTLL1	BC039353	tubulin tyrosine ligase-like family, member 1	0.709222	0.0316143
TNFAIP1	NM_021137	tumor necrosis factor, alpha-induced protein 1 (endothelial)	0.85489	0.0316188
GABARAP	NM_007278	GABA(A) receptor-associated protein	0.797496	0.0316212
SOBP	AI039933	sine oculis binding protein homolog (Drosophila)	0.737286	0.0316215
ADRA2A	AF284095	adrenergic, alpha-2A-, receptor	0.874663	0.0316308
DHFR	NM_000791	dihydrofolate reductase	0.535295	0.0316404
LMAN2L	NM_030805	lectin, mannose-binding 2-like	0.836649	0.0316647
RASSF7	NM_003475	Ras association (RalGDS	0.688679	0.0316799
CSNK1E	Z98749	casein kinase 1, epsilon	0.912633	0.0316885
C8orf40	AV711345	chromosome 8 open reading frame 40	0.89582	0.0317083
ACO2	NM_001098	aconitase 2, mitochondrial	0.77757	0.0317913
FIG4	NM_014845	FIG4 homolog (S. cerevisiae)	0.724276	0.0318143
ACADVL	NM_000018	acyl-Coenzyme A dehydrogenase, very long chain	0.794101	0.0318312
FLT4	U43143	fms-related tyrosine kinase 4	0.859673	0.0318504
KCTD20	AV707142	potassium channel tetramerisation domain containing 20	0.658916	0.0318955
SNRPA	NM_004596	small nuclear ribonucleoprotein polypeptide A	0.91339	0.0319162
FAM152A	BC020640	family with sequence similarity 152, member A	0.789715	0.0319326
MIRHG1	AF339828	microRNA host gene 1 (non-protein coding)	0.709205	0.0319522
NME3	NM_002513	non-metastatic cells 3, protein expressed in	0.754948	0.0319524
LYZ	AV711904	lysozyme (renal amyloidosis)	0.822524	0.0319548
TMEM67	BC017974	transmembrane protein 67	0.88946	0.031958
L2HGDH	BC006117	L-2-hydroxyglutarate dehydrogenase	0.823784	0.0319677
KLHL21	NM_014851	kelch-like 21 (Drosophila)	0.72424	0.0319812
SPATA8	AI638541	spermatogenesis associated 8	0.618462	0.0319998
HS6ST1	NM_004807	heparan sulfate 6-O-sulfotransferase 1	0.956014	0.0320013
GGTLC1	L20492	gamma-glutamyltransferase light chain 1	0.840522	0.0320186
OTOR	NM_020157	otoraplin	0.81248	0.0320515
ATP8A2	NM_016529	ATPase, aminophospholipid transporter-like, class I, type 8A, member 2	0.890164	0.0320608
PPM1M	N22918	protein phosphatase 1M (PP2C domain containing)	0.881284	0.0320773
MFF	BC003191	mitochondrial fission factor	0.900451	0.0321854
THBS1	AV726673	thrombospondin 1	0.841957	0.0322313
SNX24	AU144093	sorting nexin 24	0.562786	0.0322316
PIGU	AL118520	phosphatidylinositol glycan anchor biosynthesis, class U	0.843315	0.0322381
LOC728099	BC034593	hypothetical protein LOC728099	0.746694	0.0322421
THOP1	NM_003249	thimet oligopeptidase 1	0.841154	0.0322557
RECQL4	NM_004260	RecQ protein-like 4	0.855413	0.0322662
OSTCL	NM_145303	oligosaccharyltransferase complex subunit-like	0.88763	0.0322662
SNRPN	NM_022804	small nuclear ribonucleoprotein polypeptide N	0.635083	0.0323001
POLR2J4	BC006435	polymerase (RNA) II (DNA directed) polypeptide J4, pseudogene	0.821532	0.032314
NUP188	AW131863	nucleoporin 188kDa	0.870845	0.0323492
AACS	NM_023928	acetoacetyl-CoA synthetase	0.887918	0.0323505
FAM85A	AL527331	family with sequence similarity 85, member A	0.911875	0.0323762
POLR2I	AL037557	polymerase (RNA) II (DNA directed) polypeptide I, 14.5kDa	0.815212	0.0323924
FAM9A	AF494343	family with sequence similarity 9, member A	0.814759	0.0324014
SYNGR2	NM_004710	synaptogyrin 2	0.915867	0.0324059
LOC148413	AA931633	hypothetical LOC148413	0.620849	0.0324155
ARL15	NM_019087	ADP-ribosylation factor-like 15	0.822418	0.0324218
TMCC3	BG177562	transmembrane and coiled-coil domain family 3	0.861991	0.0324257
WDR92	AI653809	WD repeat domain 92	0.855385	0.0324447
PDSS2	NM_020381	prenyl (decaprenyl) diphosphate synthase, subunit 2	0.641715	0.0324612
TEX264	AU158474	testis expressed 264	0.807302	0.032502
ALDOAP2	M21191	aldolase A, fructose-bisphosphate pseudogene 2	0.820227	0.0325155
DGKE	BC022297	diacylglycerol kinase, epsilon 64kDa	0.885289	0.0325164
ERBB3	U88358	v-erb-b2 erythroblastic leukemia viral oncogene homolog 3 (avian)	0.957089	0.0325223
HSDL2	AK023959	Hydroxysteroid dehydrogenase like 2, mRNA (cDNA clone IMAGE:5286072)	0.493331	0.0325362
BCL2L12	AF289220	BCL2-like 12 (proline rich)	0.748733	0.0325956
MRPS16	BE964789	mitochondrial ribosomal protein S16	0.766274	0.0326606
FKBP4	W25881	FK506 binding protein 4, 59kDa	0.501211	0.0326947
UNG	NM_003362	uracil-DNA glycosylase	0.727027	0.0327029
PLEKHG3	AU147160	pleckstrin homology domain containing, family G (with RhoGef domain) member 3	0.906575	0.0327421
TMPO	AF113682	thymopoietin	0.875378	0.0327431
ATP2B4	NM_001684	ATPase, Ca++ transporting, plasma membrane 4	0.610194	0.0327638
LOC100129562	N33569	hypothetical protein LOC100129562	0.813451	0.0328016
CKMT1A	NM_020990	creatine kinase, mitochondrial 1A	0.84837	0.0328049
PPP3CB	NM_021132	protein phosphatase 3 (formerly 2B), catalytic subunit, beta isoform	0.960755	0.032806
SGOL2	AW965339	shugoshin-like 2 (S. pombe)	0.898258	0.0328608
CBX5	L07515	chromobox homolog 5 (HP1 alpha homolog, Drosophila)	0.500632	0.0328608
ELOVL5	AL136939	ELOVL family member 5, elongation of long chain fatty acids (FEN1	0.950621	0.0328996
TUBB2A	BF971587	tubulin, beta 2A	0.873159	0.0329203
ANAPC11	BC000607	anaphase promoting complex subunit 11	0.795176	0.0329465
LRCH4	AI654857	leucine-rich repeats and calponin homology (CH) domain containing 4	0.98588	0.0329489
TUBA1C	BC004949	tubulin, alpha 1c	0.949053	0.0329608
WDR31	BE870625	WD repeat domain 31	0.455526	0.0329732
ZNF326	AL134215	zinc finger protein 326	0.823454	0.0329769
CLPB	BC006404	ClpB caseinolytic peptidase B homolog (E. coli)	0.725278	0.0330485
POU3F4	NM_000307	POU class 3 homeobox 4	0.937767	0.0330607
HUWE1	AU140931	HECT, UBA and WWE domain containing 1	0.859881	0.0330659
TPRG1L	AK025464	tumor protein p63 regulated 1-like	0.653329	0.0330801
EFHD1	BC002449	EF-hand domain family, member D1	0.906815	0.0331103
MOSC2	AL136931	MOCO sulphurase C-terminal domain containing 2	0.959031	0.0331705
RICH2	NM_014859	Rho-type GTPase-activating protein RICH2	0.902374	0.0331769
RPAP1	NM_015540	RNA polymerase II associated protein 1	0.920787	0.0332064
ABCC5	BE550362	ATP-binding cassette, sub-family C (CFTR	0.85549	0.0332141
DDI1	AI073430	DDI1, DNA-damage inducible 1, homolog 1 (S. cerevisiae)	0.915814	0.0332918
TCTA	NM_022171	T-cell leukemia translocation altered gene	0.581039	0.0333112
PEG10	AL582836	paternally expressed 10	0.733989	0.0333289
NUMB	NM_003744	numb homolog (Drosophila)	0.818575	0.0333338
TRAF3IP2	AW296296	TRAF3 interacting protein 2	0.869092	0.0333385
FA2H	NM_024306	fatty acid 2-hydroxylase	0.812412	0.0333518
MYO1C	BE790157	myosin IC	0.889913	0.0333533
SIGMAR1	NM_005866	sigma non-opioid intracellular receptor 1	0.895336	0.0333549
C2orf34	NM_024766	chromosome 2 open reading frame 34	0.847583	0.0333615
SLC38A3	NM_006841	solute carrier family 38, member 3	0.836437	0.0333834
ATRIP	NM_130384	ATR interacting protein	0.836988	0.0334169
TMEM179B	H72927	transmembrane protein 179B	0.81228	0.0334815
DVL2	NM_004422	dishevelled, dsh homolog 2 (Drosophila)	0.952292	0.0335052
PFKFB4	AL038787	6-phosphofructo-2-kinase	0.621818	0.0335427
SUZ12	BF382924	suppressor of zeste 12 homolog (Drosophila)	0.941437	0.0335493
UBE2I	AK024172	ubiquitin-conjugating enzyme E2I (UBC9 homolog, yeast)	0.932023	0.0335587
IGSF9	AB037776	immunoglobulin superfamily, member 9	0.97252	0.0335952
LOC644215	AK090649	CDNA FLJ33330 fis, clone BRACE2000441	0.946265	0.0336043
LYRM2	AV682940	LYR motif containing 2	0.784559	0.0336234
MAPK3	X60188	mitogen-activated protein kinase 3	0.799042	0.0336235
PER3	NM_016831	period homolog 3 (Drosophila)	0.748298	0.033647
INCENP	NM_020238	inner centromere protein antigens 135	0.950399	0.0336579
UROS	NM_000375	uroporphyrinogen III synthase	0.75877	0.0336591
NR2F6	BF000629	nuclear receptor subfamily 2, group F, member 6	0.874339	0.0337368
IPO4	NM_024658	importin 4	0.865408	0.0337437
COPE	NM_007263	coatomer protein complex, subunit epsilon	0.895234	0.0338059
LZTS2	BF032717	leucine zipper, putative tumor suppressor 2	0.971376	0.0338082
LRP3	NM_002333	low density lipoprotein receptor-related protein 3	0.888788	0.0338343
TSPAN12	NM_012338	tetraspanin 12	0.793633	0.0338539
SLC28A1	U62966	solute carrier family 28 (sodium-coupled nucleoside transporter), member 1	0.95671	0.033899
SLC25A23	NM_024103	solute carrier family 25 (mitochondrial carrier; phosphate carrier), member 23	0.965114	0.0339572
PP2672	AF193050	hypothetical LOC100130249	0.788909	0.033992
TUT1	NM_022830	terminal uridylyl transferase 1, U6 snRNA-specific	0.96887	0.0340019
WDR18	BC001648	WD repeat domain 18	0.829432	0.0340426
HHLA2	NM_007072	HERV-H LTR-associating 2	0.919731	0.0340525
PRNP	AK056897	prion protein	0.709907	0.0341272
ARHGAP4	NM_001666	Rho GTPase activating protein 4	0.972435	0.0341349
RAB2A	M28213	RAB2A, member RAS oncogene family	0.872029	0.0341534
PPIA	AI708767	peptidylprolyl isomerase A (cyclophilin A)	0.642678	0.0341697
NKIRAS2	AA452565	NFKB inhibitor interacting Ras-like 2	0.84645	0.0341759
LOC390354	NM_000980	ribosomal protein L18a pseudogene	0.813706	0.0341792
TBC1D8	AA779927	TBC1 domain family, member 8 (with GRAM domain)	0.758528	0.0341839
GGA1	NM_013365	golgi associated, gamma adaptin ear containing, ARF binding protein 1	0.844448	0.0341982
KIAA0100	NM_014680	KIAA0100	0.761203	0.034222
LOC729580	BG469257	hypothetical LOC729580	0.684389	0.0342458
RAP2A	AI302106	RAP2A, member of RAS oncogene family	0.814656	0.0342537
PAK7	AB040812	p21 protein (Cdc42	0.881792	0.0342665
SFRS18	AI936531	splicing factor, arginine	0.84	0.0343036
ACO1	NM_002197	aconitase 1, soluble	0.337821	0.0343386
FBP1	D26054	fructose-1,6-bisphosphatase 1	0.588935	0.0343683
RTN2	NM_005619	reticulon 2	0.791565	0.0343807
C14orf176	BQ649429	PREDICTED: Homo sapiens chromosome 14 open reading frame 176 (C14orf176), mRNA	0.836511	0.0343812
MRPL37	AF325707	mitochondrial ribosomal protein L37	0.733657	0.0344831
CDCA7L	AK022955	cell division cycle associated 7-like	0.58007	0.03452
MAP3K6	NM_004672	mitogen-activated protein kinase kinase kinase 6	0.919348	0.0345235
PPP1R13L	NM_006663	protein phosphatase 1, regulatory (inhibitor) subunit 13 like	0.863271	0.0345442
ZFPM1	AW295488	Zinc finger protein, multitype 1 (ZFPM1), mRNA	0.908051	0.0345587
SIAE	AF300796	sialic acid acetylesterase	0.816864	0.0345818
ALDH6A1	BG399778	aldehyde dehydrogenase 6 family, member A1	0.563616	0.0346254
ZNF185	NM_007150	zinc finger protein 185 (LIM domain)	0.670725	0.0346461
MAPRE2	AB016823	microtubule-associated protein, RP	0.756386	0.0346483
IKBKG	AF091453	inhibitor of kappa light polypeptide gene enhancer in B-cells, kinase gamma	0.939178	0.034661
SPAG9	BG290577	sperm associated antigen 9	0.936219	0.0346683
C3orf37	AI937543	Clone 23837 mRNA sequence	0.784775	0.0346823
FUK	AW080798	fucokinase	0.764358	0.0347103
NECAB2	AV723666	N-terminal EF-hand calcium binding protein 2	0.764665	0.0347354
CPAMD8	AB033109	C3 and PZP-like, alpha-2-macroglobulin domain containing 8	0.915222	0.034756
C22orf13	BC004144	chromosome 22 open reading frame 13	0.934086	0.0348035
NONO	BC003129	non-POU domain containing, octamer-binding	0.907403	0.0348042
LANCL1	AI935255	LanC lantibiotic synthetase component C-like 1 (bacterial)	0.542585	0.0348164
KCNIP4	AY029176	Kv channel interacting protein 4	0.815557	0.0348223
COPZ2	NM_016429	coatomer protein complex, subunit zeta 2	0.833736	0.0348448
TOR1AIP2	BF508833	torsin A interacting protein 2	0.826377	0.034861
PAF1	NM_019088	Paf1, RNA polymerase II associated factor, homolog (S. cerevisiae)	0.861464	0.0349039
SDR39U1	AI347090	short chain dehydrogenase	0.731545	0.0349153
HIATL1	AF255650	hippocampus abundant transcript-like 1	0.809589	0.0349211
OSGEP	AB050442	O-sialoglycoprotein endopeptidase	0.953502	0.0349587
TMC4	BE645551	transmembrane channel-like 4	0.769109	0.0349757
PHACTR1	AW468218	phosphatase and actin regulator 1	0.77408	0.0350103
JUB	AK025567	jub, ajuba homolog (Xenopus laevis)	0.933855	0.035039
COL4A5	AL034369	collagen, type IV, alpha 5	0.770245	0.0350456
GFPT1	BE645771	glutamine-fructose-6-phosphate transaminase 1	0.746811	0.0351084
ROM1	NM_000327	retinal outer segment membrane protein 1	0.797745	0.0351306
EPS8L2	NM_022772	EPS8-like 2	0.878833	0.0351335
GNS	AW167793	glucosamine (N-acetyl)-6-sulfatase	0.604496	0.0351441
LOC652147	Z70200	similar to U5 snRNP-specific protein, 200 kDa	0.920963	0.0351719
C21orf58	AK098098	chromosome 21 open reading frame 58	0.802871	0.0351747
TLCD1	BE328850	TLC domain containing 1	0.838316	0.0351756
DHRS4	NM_021004	dehydrogenase	0.890581	0.0351861
SLC47A1	NM_018242	solute carrier family 47, member 1	0.868199	0.0352006
RNF167	AK025329	ring finger protein 167	0.84405	0.0352115
MYBPC1	BF593509	myosin binding protein C, slow type	0.830604	0.0352233
PLEKHO2	NM_025201	pleckstrin homology domain containing, family O member 2	0.1	0.0352233
ATP5J2	BG981988	ATP synthase, H+ transporting, mitochondrial F0 complex, subunit F2	0.841391	0.035266
STK11	NM_000455	serine	0.897963	0.0353011
RFXANK	NM_003721	regulatory factor X-associated ankyrin-containing protein	0.924513	0.0353332
TMCO1	AF277194	transmembrane and coiled-coil domains 1	0.769213	0.0353362
RPL6	NM_000970	ribosomal protein L6	0.869179	0.0353595
XGPY2	Z48518	Xg pseudogene, Y-linked 2	0.596379	0.0353929
BTBD1	NM_025238	BTB (POZ) domain containing 1	0.891033	0.0354225
C11orf73	AA782955	chromosome 11 open reading frame 73	0.820522	0.0354407
HIST1H2AD	NM_021065	histone cluster 1, H2ad	0.828017	0.0354426
COX15	BC002382	COX15 homolog, cytochrome c oxidase assembly protein (yeast)	0.766515	0.0354693
CLN6	NM_017882	ceroid-lipofuscinosis, neuronal 6, late infantile, variant	0.859562	0.0355266
EIF3L	NM_016091	eukaryotic translation initiation factor 3, subunit L	0.57318	0.0355413
AYP1p1	Z48511	AYP1 pseudogene 1	0.8806	0.035569
SF3B5	NM_031287	splicing factor 3b, subunit 5, 10kDa	0.782096	0.03557
ASH2L	AB020982	ash2 (absent, small, or homeotic)-like (Drosophila)	0.894455	0.0356174
GAA	NM_000152	glucosidase, alpha; acid	0.878669	0.0356341
ZDHHC16	BC004535	zinc finger, DHHC-type containing 16	0.693837	0.0357013
AAAS	NM_015665	achalasia, adrenocortical insufficiency, alacrimia (Allgrove, triple-A)	0.858782	0.0357475
APH1B	NM_031301	anterior pharynx defective 1 homolog B (C. elegans)	0.611824	0.0358172
RPL23A	NM_000984	ribosomal protein L23a	0.763214	0.0358285
SLFN11	AW003459	schlafen family member 11	0.852121	0.0358652
GRK6	AF040752	G protein-coupled receptor kinase 6	0.80286	0.035898
IMPDH2	NM_000884	IMP (inosine monophosphate) dehydrogenase 2	0.718195	0.0359155
ARRDC1	AK001822	arrestin domain containing 1	0.905802	0.0359222
APLN	AI762422	Full length insert cDNA clone ZD38F03	0.866214	0.0359434
PROC	NM_000312	protein C (inactivator of coagulation factors Va and VIIIa)	0.873619	0.0359464
TCF19	BC002493	transcription factor 19 (SC1)	0.751794	0.0360259
GMDS	NM_001500	GDP-mannose 4,6-dehydratase	0.751157	0.0360393
SRD5A2L2	AI822082	steroid 5 alpha-reductase 2-like 2	0.551111	0.0360878
LSM3	NM_014463	LSM3 homolog, U6 small nuclear RNA associated (S. cerevisiae)	0.842967	0.0361127
PLCH2	NM_014638	phospholipase C, eta 2	0.969815	0.0361209
DCP2	AA504595	DCP2 decapping enzyme homolog (S. cerevisiae)	0.800324	0.03613
CYB5D2	BE044480	cytochrome b5 domain containing 2	0.84887	0.0361467
ARSB	NM_000046	arylsulfatase B	0.80948	0.0361603
NNT	U40490	nicotinamide nucleotide transhydrogenase	0.763735	0.0362767
EXOC7	AK022397	exocyst complex component 7	0.872372	0.0362773
C5orf26	BF314746	chromosome 5 open reading frame 26	0.926544	0.0362791
CAD	NM_004341	carbamoyl-phosphate synthetase 2, aspartate transcarbamylase, and dihydroorotase	0.85457	0.0362831
LYZL1	BF979319	lysozyme-like 1	0.923707	0.0362858
PLD3	NM_012268	phospholipase D family, member 3	0.883907	0.0362955
FLJ42957	BI837301	Homo sapiens, clone IMAGE:5229510, mRNA	0.749781	0.0362987
RPL29	BF683426	ribosomal protein L29	0.772219	0.036312
LOC91431	AF075091	prematurely terminated mRNA decay factor-like	0.676398	0.0363299
COMMD7	AA148301	COMM domain containing 7	0.597032	0.0363391
WDR78	NM_024763	WD repeat domain 78	0.841624	0.0363683
DTL	NM_016448	denticleless homolog (Drosophila)	0.682087	0.0363866
REXO2	BC003502	REX2, RNA exonuclease 2 homolog (S. cerevisiae)	0.833822	0.0363996
TPM4	BC002827	tropomyosin 4	0.975703	0.0364112
ANKRD52	AA458879	ankyrin repeat domain 52	0.76917	0.0364329
ATP10B	NM_025153	ATPase, class V, type 10B	0.856731	0.036442
EFCAB2	AW591765	CDNA FLJ60994 complete cds, highly similar to Homo sapiens EF-hand calcium binding domain 2 (EFCAB2), mRNA	0.623037	0.0364705
UNC119	NM_005148	unc-119 homolog (C. elegans)	0.905039	0.0364809
C19orf53	NM_014047	chromosome 19 open reading frame 53	0.801913	0.0364978
MVD	AI189359	mevalonate (diphospho) decarboxylase	0.852243	0.0365051
CREB3	AF029674	cAMP responsive element binding protein 3	0.723406	0.0365424
CCDC135	AL136907	coiled-coil domain containing 135	0.932006	0.0365781
NDUFA10	BC031332	NADH dehydrogenase (ubiquinone) 1 alpha subcomplex, 10, 42kDa	0.793053	0.036579
KRCC1	BE326678	lysine-rich coiled-coil 1	0.795684	0.0365798
RBBP9	AL121893	retinoblastoma binding protein 9	0.699621	0.0366051
FOXD1	AI080288	Forkhead protein FREAC-4	0.869833	0.0366109
ZNF227	AC074331	zinc finger protein 227	0.798571	0.0366132
INF2	BC006173	inverted formin, FH2 and WH2 domain containing	0.938428	0.0366331
DEDD	AK022531	death effector domain containing	0.94091	0.0366363
LOC128192	AL021395	similar to peptidyl-Pro cis trans isomerase	0.753977	0.0366385
STXBP5L	BC022029	syntaxin binding protein 5-like	0.783353	0.0367346
GTF2F1	AW190445	general transcription factor IIF, polypeptide 1, 74kDa	0.933623	0.036764
CARD14	AI950942	caspase recruitment domain family, member 14	0.953629	0.0367666
PRR11	AK000296	proline rich 11	0.535936	0.0367727
NUP43	BF978064	nucleoporin 43kDa	0.584578	0.0368213
C21orf33	D86062	chromosome 21 open reading frame 33	0.861715	0.0368677
GREM1	AF154054	gremlin 1, cysteine knot superfamily, homolog (Xenopus laevis)	0.94628	0.0368711
RAB13	NM_002870	RAB13, member RAS oncogene family	0.752938	0.0368795
TMEM79	BC005094	transmembrane protein 79	0.767631	0.0368813
SLC15A1	AB001328	solute carrier family 15 (oligopeptide transporter), member 1	0.958615	0.0369095
C1orf183	NM_019099	chromosome 1 open reading frame 183	0.726104	0.0369217
TPD52L1	AF208012	tumor protein D52-like 1	0.73308	0.0369411
TTC30B	AW117691	tetratricopeptide repeat domain 30B	0.627713	0.0369456
[truncated: 594 more rows]
